# Supplementary material
Source: publisher figshare collection journal article supplement (https://frontiersin.figshare.com/ndownloader/files/12952889)
Supplement: Supplementary file 1 [file 12952889]

Supplementary Material

Diversity of Mesopelagic Fishes in the Southern Ocean - a Phylogeographic Perspective Using DNA Barcoding

Henrik Christiansen*, Agnès Dettaï, Franz M. Heindler, Martin A. Collins, Guy Duhamel, Mélyne Hautecœur, Dirk Steinke, Filip A.M. Volckaert, Anton P. Van de Putte

*** Correspondence:** Corresponding Author: [henrik.christiansen@kuleuven.be](mailto:henrik.christiansen@kuleuven.be)

**Supplementary Table S1.** Mesopelagic fish used for DNA analyses with specimen and sequence ID and collection information as available in the Barcode of Life Data Systems (BOLD) as well as respective BOLD Barcode Index Number (BOLD BIN). Sampling coordinates displayed as latitude (Lat) and longitude (Lon) in decimal degrees. Cytochrome oxidase subunit I (*COI*) and/or rhodopsin (*rh1*) sequences are available for these individuals unless the respective column contains a zero. Storing institution (Inst.) abbreviations: British Antarctic Survey, Cambridge, UK (BAS), South African Institute for Aquatic Biodiversity, Grahamstown, South Africa (SAIAB), KU Leuven, Leuven, Belgium (KUL), Museum National d’Histoire Naturelle, Paris, France (MNHN). Samples from France are from the French Southern and Antarctic Lands. Further collection details for some individuals available in BOLD. Species identities highlighted in yellow have been revised or updated (see main text and table 2).

| **BOLD dataset** | **Sample ID** | **Sequence ID** | **BOLD BIN** | **Inst.** | ***Species*** | **Collection Date** | **Country/Ocean** | **Region** | **Lat** | **Lon** | ***COI*** | ***RhI*** |
| --- | --- | --- | --- | --- | --- | --- | --- | --- | --- | --- | --- | --- |
| BASMF | SG09_no33_Aethotaxis | CAOII859-09 |  | BAS | *Aethotaxis mitopteryx* | 19-Jan-2009 | South Georgia Islands | NW South Georgia | -53,753 | -37,466 | 658 | 0 |
| BASMF | BEM#1 | BASMC066-09 | [BOLD:AAF0459](http://www.boldsystems.org/index.php/Public_BarcodeCluster?clusteruri=BOLD:AAF0459) | BAS | *Lagiacrusichthys macropinna* | 30-Nov-2006 | Antarctica | Scotia Sea | -57,79 | -50,63 | 581 | 0 |
| BASMF | BOA#1 | BASMC067-09 | [BOLD:AAB5140](http://www.boldsystems.org/index.php/Public_BarcodeCluster?clusteruri=BOLD:AAB5140) | BAS | *Borostomias antarcticus* | 30-Oct-2006 | Antarctica | Scotia Sea | -57,76 | -50,45 | 652 | 0 |
| BASMF | BOA#2 | BASMC068-09 | [BOLD:AAB5140](http://www.boldsystems.org/index.php/Public_BarcodeCluster?clusteruri=BOLD:AAB5140) | BAS | *Borostomias antarcticus* | 30-Oct-2006 | Antarctica | Scotia Sea | -57,76 | -50,45 | 652 | 0 |
| BASMF | ELN#1 | BASMC006-09 | [BOLD:AAB3737](http://www.boldsystems.org/index.php/Public_BarcodeCluster?clusteruri=BOLD:AAB3737) | BAS | *Electrona antarctica* | 30-Oct-2006 | Antarctica | Scotia Sea | -57,79 | -50,63 | 641 | 0 |
| BASMF | ELN#2 | BASMC007-09 | [BOLD:AAB3737](http://www.boldsystems.org/index.php/Public_BarcodeCluster?clusteruri=BOLD:AAB3737) | BAS | *Electrona antarctica* | 01-Nov-2006 |  |  | -60,5 | -48,75 | 648 | 0 |
| BASMF | ELN#3 | BASMC008-09 | [BOLD:AAB3737](http://www.boldsystems.org/index.php/Public_BarcodeCluster?clusteruri=BOLD:AAB3737) | BAS | *Electrona antarctica* | Antarctica | Scotia Sea | Scotia Sea | -60,5 | -48,75 | 648 | 0 |
| BASMF | ELN#4 | BASMC009-09 | [BOLD:AAB3737](http://www.boldsystems.org/index.php/Public_BarcodeCluster?clusteruri=BOLD:AAB3737) | BAS | *Electrona antarctica* | 30-Oct-2006 | Antarctica | Scotia Sea | -57,79 | -50,63 | 648 | 0 |
| BASMF | ELN#5 | BASMC010-09 | [BOLD:AAB3737](http://www.boldsystems.org/index.php/Public_BarcodeCluster?clusteruri=BOLD:AAB3737) | BAS | *Electrona antarctica* | 01-Nov-2006 | Antarctica | Scotia Sea | -60,5 | -48,75 | 648 | 0 |
| BASMF | ELC#1 | BASMC011-09 | [BOLD:AAB8433](http://www.boldsystems.org/index.php/Public_BarcodeCluster?clusteruri=BOLD:AAB8433) | BAS | *Electrona carlsbergi* | 30-Oct-2006 | Antarctica | Scotia Sea | -57,79 | -50,63 | 648 | 0 |
| BASMF | ELC#2 | BASMC012-09 | [BOLD:AAB8433](http://www.boldsystems.org/index.php/Public_BarcodeCluster?clusteruri=BOLD:AAB8433) | BAS | *Electrona carlsbergi* | 29-Nov-2006 | Antarctica | Scotia Sea | -57,67 | -50,42 | 648 | 0 |
| BASMF | ELC#3 | BASMC013-09 | [BOLD:AAB8433](http://www.boldsystems.org/index.php/Public_BarcodeCluster?clusteruri=BOLD:AAB8433) | BAS | *Electrona carlsbergi* | 29-Nov-2006 | Antarctica | Scotia Sea | -57,67 | -50,42 | 648 | 0 |
| BASMF | ELC#4 | BASMC014-09 | [BOLD:AAB8433](http://www.boldsystems.org/index.php/Public_BarcodeCluster?clusteruri=BOLD:AAB8433) | BAS | *Electrona carlsbergi* | 29-Nov-2006 | Antarctica | Scotia Sea | -57,67 | -50,42 | 647 | 0 |
| BASMF | ELC#5 | BASMC015-09 | [BOLD:AAB8433](http://www.boldsystems.org/index.php/Public_BarcodeCluster?clusteruri=BOLD:AAB8433) | BAS | *Electrona carlsbergi* | 29-Nov-2006 | Antarctica | Scotia Sea | -57,67 | -50,42 | 648 | 0 |
| BASMF | ELS#1 | BASMC042-09 | [BOLD:AAD8917](http://www.boldsystems.org/index.php/Public_BarcodeCluster?clusteruri=BOLD:AAD8917) | BAS | *Electrona subaspera* | 16-Jan-2008 | Antarctica | Scotia Sea | -50,55 | -34,05 | 652 | 0 |
| BASMF | GYB#1 | BASMC041-09 | [BOLD:AAC7549](http://www.boldsystems.org/index.php/Public_BarcodeCluster?clusteruri=BOLD:AAC7549) | BAS | *Gymnoscopelus bolini* | 16-Jan-2008 | Antarctica | Scotia Sea | -59,68 | -44,14 | 648 | 0 |
| BASMF | Gymnoscopelus_bolini_ | CAOII857-09 |  | BAS | *Gymnoscopelus bolini* | 13-Jan-2009 | South Georgia and the South Sandwich Islands | NW South Georgia | -53,798 | -39,07 | 0 | 0 |
| BASMF | GYR#1 | BASMC043-09 | [BOLD:AAB5232](http://www.boldsystems.org/index.php/Public_BarcodeCluster?clusteruri=BOLD:AAB5232) | BAS | *Gymnoscopelus braueri* | 30-Oct-2006 | Antarctica | Scotia Sea | -57,76 | -50,45 | 648 | 0 |
| BASMF | GYR#2 | BASMC044-09 | [BOLD:AAB5232](http://www.boldsystems.org/index.php/Public_BarcodeCluster?clusteruri=BOLD:AAB5232) | BAS | *Gymnoscopelus braueri* | 30-Oct-2006 | Antarctica | Scotia Sea | -57,76 | -50,45 | 648 | 0 |
| BASMF | GYR#3 | BASMC045-09 | [BOLD:AAB5232](http://www.boldsystems.org/index.php/Public_BarcodeCluster?clusteruri=BOLD:AAB5232) | BAS | *Gymnoscopelus braueri* | 30-Oct-2006 | Antarctica | Scotia Sea | -57,79 | -50,63 | 637 | 0 |
| BASMF | GYR#4 | BASMC046-09 | [BOLD:AAB5232](http://www.boldsystems.org/index.php/Public_BarcodeCluster?clusteruri=BOLD:AAB5232) | BAS | *Gymnoscopelus braueri* | 30-Oct-2006 | Antarctica | Scotia Sea | -57,79 | -50,63 | 648 | 0 |
| BASMF | GYR#5 | BASMC047-09 | [BOLD:AAB5232](http://www.boldsystems.org/index.php/Public_BarcodeCluster?clusteruri=BOLD:AAB5232) | BAS | *Gymnoscopelus braueri* | 30-Oct-2006 | Antarctica | Scotia Sea | -57,79 | -50,63 | 648 | 0 |
| BASMF | GYF#1 | BASMC036-09 | [BOLD:ACE4884](http://www.boldsystems.org/index.php/Public_BarcodeCluster?clusteruri=BOLD:ACE4884) | BAS | *Gymnoscopelus fraseri* | 23-Mar-2004 | Antarctica | Scotia Sea | -53,31 | -37,98 | 648 | 0 |
| BASMF | GYF#2 | BASMC037-09 | [BOLD:ACE4884](http://www.boldsystems.org/index.php/Public_BarcodeCluster?clusteruri=BOLD:ACE4884) | BAS | *Gymnoscopelus fraseri* | 23-Mar-2004 | Antarctica | Scotia Sea | -53,31 | -37,98 | 648 | 0 |
| BASMF | GYF#3 | BASMC038-09 | [BOLD:ABZ1021](http://www.boldsystems.org/index.php/Public_BarcodeCluster?clusteruri=BOLD:ABZ1021) | BAS | *Gymnoscopelus fraseri* | 28-Nov-2008 | Antarctica | Scotia Sea | -49,95 | -38,06 | 648 | 0 |
| BASMF | GYF#4 | BASMC039-09 | [BOLD:AAC7549](http://www.boldsystems.org/index.php/Public_BarcodeCluster?clusteruri=BOLD:AAC7549) | BAS | *Gymnoscopelus bolini* | 28-Nov-2008 | Antarctica | Scotia Sea | -49,95 | -38,06 | 648 | 0 |
| BASMF | GYF#5 | BASMC040-09 | [BOLD:ABZ1021](http://www.boldsystems.org/index.php/Public_BarcodeCluster?clusteruri=BOLD:ABZ1021) | BAS | *Gymnoscopelus fraseri* | 28-Nov-2008 | Antarctica | Scotia Sea | -49,95 | -38,06 | 648 | 0 |
| BASMF | GYN#1 | BASMC026-09 | [BOLD:AAB0899](http://www.boldsystems.org/index.php/Public_BarcodeCluster?clusteruri=BOLD:AAB0899) | BAS | *Gymnoscopelus nicholsi* | 30-Oct-2006 | Antarctica | Scotia Sea | -57,79 | -40,02 | 648 | 0 |
| BASMF | GYN#2 | BASMC027-09 | [BOLD:AAB0899](http://www.boldsystems.org/index.php/Public_BarcodeCluster?clusteruri=BOLD:AAB0899) | BAS | *Gymnoscopelus nicholsi* | 20-Jan-2008 | Antarctica | Scotia Sea | -58,01 | -43,05 | 648 | 0 |
| BASMF | GYN#3 | BASMC028-09 | [BOLD:AAB0899](http://www.boldsystems.org/index.php/Public_BarcodeCluster?clusteruri=BOLD:AAB0899) | BAS | *Gymnoscopelus nicholsi* | 20-Jan-2008 | Antarctica | Scotia Sea | -58,01 | -43,05 | 648 | 0 |
| BASMF | GYN#4 | BASMC029-09 | [BOLD:AAB0899](http://www.boldsystems.org/index.php/Public_BarcodeCluster?clusteruri=BOLD:AAB0899) | BAS | *Gymnoscopelus nicholsi* | 20-Jan-2008 | Antarctica | Scotia Sea | -58,01 | -43,05 | 648 | 0 |
| BASMF | GYO#1 | BASMC031-09 | [BOLD:AAB6899](http://www.boldsystems.org/index.php/Public_BarcodeCluster?clusteruri=BOLD:AAB6899) | BAS | *Gymnoscopelus opisthopterus* | 01-Nov-2008 | Antarctica | Scotia Sea | -60,47 | -48,78 | 648 | 0 |
| BASMF | GYO#2 | BASMC032-09 | [BOLD:AAB6899](http://www.boldsystems.org/index.php/Public_BarcodeCluster?clusteruri=BOLD:AAB6899) | BAS | *Gymnoscopelus opisthopterus* | 01-Nov-2008 | Antarctica | Scotia Sea | -60,47 | -48,78 | 648 | 0 |
| BASMF | GYO#3 | BASMC033-09 | [BOLD:AAB6899](http://www.boldsystems.org/index.php/Public_BarcodeCluster?clusteruri=BOLD:AAB6899) | BAS | *Gymnoscopelus opisthopterus* | 08-Nov-2008 | Antarctica | Scotia Sea | -59,63 | -44,15 | 648 | 0 |
| BASMF | GYO#4 | BASMC034-09 | [BOLD:AAB6899](http://www.boldsystems.org/index.php/Public_BarcodeCluster?clusteruri=BOLD:AAB6899) | BAS | *Gymnoscopelus opisthopterus* | 08-Nov-2008 | Antarctica | Scotia Sea | -59,63 | -44,15 | 648 | 0 |
| BASMF | GYO#5 | BASMC035-09 | [BOLD:AAB6899](http://www.boldsystems.org/index.php/Public_BarcodeCluster?clusteruri=BOLD:AAB6899) | BAS | *Gymnoscopelus opisthopterus* | 08-Nov-2008 | Antarctica | Scotia Sea | -59,63 | -44,15 | 648 | 0 |
| BASMF | GYP#1 | BASMC030-09 | [BOLD:AAB0899](http://www.boldsystems.org/index.php/Public_BarcodeCluster?clusteruri=BOLD:AAB0899) | BAS | *Gymnoscopelus nicholsi* | 30-Oct-2006 | Antarctica | Scotia Sea | -57,79 | -50,63 | 648 | 0 |
| BASMF | KRA #1 | BASMC001-09 | [BOLD:AAC6875](http://www.boldsystems.org/index.php/Public_BarcodeCluster?clusteruri=BOLD:AAC6875) | BAS | *Krefftichthys anderssoni* | 21-Nov-2006 | Antarctica | Scotia Sea | -55,26 | -41,16 | 652 | 0 |
| BASMF | KRA #2 | BASMC002-09 | [BOLD:AAC6875](http://www.boldsystems.org/index.php/Public_BarcodeCluster?clusteruri=BOLD:AAC6875) | BAS | *Krefftichthys anderssoni* | 21-Nov-2006 | Antarctica | Scotia Sea | -55,26 | -41,16 | 652 | 0 |
| BASMF | KRA #3 | BASMC003-09 | [BOLD:AAC6875](http://www.boldsystems.org/index.php/Public_BarcodeCluster?clusteruri=BOLD:AAC6875) | BAS | *Krefftichthys anderssoni* | 21-Nov-2006 | Antarctica | Scotia Sea | -55,26 | -41,16 | 652 | 0 |
| BASMF | KRA #4 | BASMC004-09 | [BOLD:AAC6875](http://www.boldsystems.org/index.php/Public_BarcodeCluster?clusteruri=BOLD:AAC6875) | BAS | *Krefftichthys anderssoni* | 21-Nov-2006 | Antarctica | Scotia Sea | -55,26 | -41,16 | 652 | 0 |
| BASMF | KRA #5 | BASMC005-09 | [BOLD:AAC6875](http://www.boldsystems.org/index.php/Public_BarcodeCluster?clusteruri=BOLD:AAC6875) | BAS | *Krefftichthys anderssoni* | 17-Nov-2006 | Antarctica | Scotia Sea | -57,3 | -42,84 | 652 | 0 |
| BASMF | LAC#1 | BASMC021-09 | [BOLD:AAB3778](http://www.boldsystems.org/index.php/Public_BarcodeCluster?clusteruri=BOLD:AAB3778) | BAS | *Nannobrachium achirus* | 30-Oct-2006 | Antarctica | Scotia Sea | -57,69 | -50,47 | 652 | 0 |
| BASMF | LAC#2 | BASMC022-09 | [BOLD:AAB3778](http://www.boldsystems.org/index.php/Public_BarcodeCluster?clusteruri=BOLD:AAB3778) | BAS | *Nannobrachium achirus* | 26-Nov-2006 | Antarctica | Scotia Sea | -57,69 | -40,02 | 652 | 0 |
| BASMF | LAC#3 | BASMC023-09 | [BOLD:AAB3778](http://www.boldsystems.org/index.php/Public_BarcodeCluster?clusteruri=BOLD:AAB3778) | BAS | *Nannobrachium achirus* | 26-Nov-2006 | Antarctica | Scotia Sea | -57,69 | -40,02 | 652 | 0 |
| BASMF | LAC#4 | BASMC024-09 | [BOLD:AAB3778](http://www.boldsystems.org/index.php/Public_BarcodeCluster?clusteruri=BOLD:AAB3778) | BAS | *Nannobrachium achirus* | 26-Nov-2006 | Antarctica | Scotia Sea | -57,69 | -40,02 | 652 | 0 |
| BASMF | LAC#5 | BASMC025-09 | [BOLD:AAB3778](http://www.boldsystems.org/index.php/Public_BarcodeCluster?clusteruri=BOLD:AAB3778) | BAS | *Nannobrachium achirus* | 26-Nov-2006 | Antarctica | Scotia Sea | -57,69 | -40,02 | 652 | 0 |
| BASMF | CER#1 | BASMC048-09 | [BOLD:AAD9321](http://www.boldsystems.org/index.php/Public_BarcodeCluster?clusteruri=BOLD:AAD9321) | BAS | *Oneirodes notius* | 23-Mar-2004 | Antarctica | Scotia Sea | -53,31 | -37,98 | 652 | 0 |
| BASMF | PMC#1 | BASMC060-09 | [BOLD:AAB7779](http://www.boldsystems.org/index.php/Public_BarcodeCluster?clusteruri=BOLD:AAB7779) | BAS | *Poromitra capito* | 26-Nov-2006 | Antarctica | Scotia Sea | -52,85 | -40,02 | 652 | 0 |
| BASMF | PMC#2 | BASMC061-09 | [BOLD:AAB7779](http://www.boldsystems.org/index.php/Public_BarcodeCluster?clusteruri=BOLD:AAB7779) | BAS | *Poromitra capito* | 26-Nov-2006 | Antarctica | Scotia Sea | -52,85 | -40,02 | 652 | 0 |
| BASMF | PMC#3 | BASMC062-09 | [BOLD:AAB7779](http://www.boldsystems.org/index.php/Public_BarcodeCluster?clusteruri=BOLD:AAB7779) | BAS | *Poromitra capito* | 26-Nov-2006 | Antarctica | Scotia Sea | -57,76 | -50,45 | 652 | 0 |
| BASMF | PRA#1 | BASMC059-09 |  | BAS | *Protomyctophum andriashevi* | 26-Nov-2006 | Antarctica | Scotia Sea | -52,9 | -40,04 | 0 | 0 |
| BASMF | PRM#1 | BASMC049-09 | [BOLD:AAC7885](http://www.boldsystems.org/index.php/Public_BarcodeCluster?clusteruri=BOLD:AAC7885) | BAS | *Protomyctophum bolini* | 28-Nov-2006 | Antarctica | Scotia Sea | -50,12 | -38,14 | 648 | 0 |
| BASMF | PRM#2 | BASMC050-09 | [BOLD:AAC7885](http://www.boldsystems.org/index.php/Public_BarcodeCluster?clusteruri=BOLD:AAC7885) | BAS | *Protomyctophum bolini* | 28-Nov-2006 | Antarctica | Scotia Sea | -50,12 | -38,14 | 648 | 0 |
| BASMF | PRM#3 | BASMC051-09 | [BOLD:AAC7885](http://www.boldsystems.org/index.php/Public_BarcodeCluster?clusteruri=BOLD:AAC7885) | BAS | *Protomyctophum bolini* | 05-Feb-2008 | Antarctica | Scotia Sea | -52,72 | -39,08 | 648 | 0 |
| BASMF | PRM#4 | BASMC052-09 | [BOLD:AAC7885](http://www.boldsystems.org/index.php/Public_BarcodeCluster?clusteruri=BOLD:AAC7885) | BAS | *Protomyctophum bolini* | 05-Feb-2008 | Antarctica | Scotia Sea | -52,72 | -39,08 | 640 | 0 |
| BASMF | PRM#5 | BASMC053-09 | [BOLD:AAC7885](http://www.boldsystems.org/index.php/Public_BarcodeCluster?clusteruri=BOLD:AAC7885) | BAS | *Protomyctophum bolini* | 05-Feb-2008 | Antarctica | Scotia Sea | -52,72 | -39,08 | 648 | 0 |
| BASMF | PRY#1 | BASMC054-09 | [BOLD:AAD9636](http://www.boldsystems.org/index.php/Public_BarcodeCluster?clusteruri=BOLD:AAD9636) | BAS | *Protomyctophum choriodon* | 15-Mar-2004 | Antarctica | Scotia Sea | -53,79 | -40,22 | 648 | 0 |
| BASMF | PRY#2 | BASMC055-09 | [BOLD:AAD9636](http://www.boldsystems.org/index.php/Public_BarcodeCluster?clusteruri=BOLD:AAD9636) | BAS | *Protomyctophum choriodon* | 15-Mar-2004 | Antarctica | Scotia Sea | -53,79 | -40,22 | 648 | 0 |
| BASMF | PRG#1 | BASMC056-09 | [BOLD:ACE3466](http://www.boldsystems.org/index.php/Public_BarcodeCluster?clusteruri=BOLD:ACE3466) | BAS | *Protomyctophum gemmatum* | 20-Nov-2006 | Antarctica | Scotia Sea | -55,21 | -41,38 | 648 | 0 |
| BASMF | PRL#1 | BASMC057-09 | [BOLD:AAC7885](http://www.boldsystems.org/index.php/Public_BarcodeCluster?clusteruri=BOLD:AAC7885) | BAS | *Protomyctophum bolini* | 30-Oct-2006 | Antarctica | Scotia Sea | -57,69 | -50,46 | 648 | 0 |
| BASMF | PRP#1 | BASMC058-09 | [BOLD:ACF2373](http://www.boldsystems.org/index.php/Public_BarcodeCluster?clusteruri=BOLD:ACF2373) | BAS | *Protomyctophum parallelum* | 30-Oct-2006 | Antarctica | Scotia Sea | -57,69 | -50,46 | 652 | 0 |
| BASMF | PRE#1 | BASMC016-09 | [BOLD:AAD9622](http://www.boldsystems.org/index.php/Public_BarcodeCluster?clusteruri=BOLD:AAD9622) | BAS | *Protomyctophum tenisoni* | 07-Feb-2008 | Antarctica | Scotia Sea | -50,55 | -34,05 | 648 | 0 |
| BASMF | PRE#2 | BASMC017-09 | [BOLD:AAD9622](http://www.boldsystems.org/index.php/Public_BarcodeCluster?clusteruri=BOLD:AAD9622) | BAS | *Protomyctophum tenisoni* | 07-Feb-2008 | Antarctica | Scotia Sea | -50,55 | -34,05 | 648 | 0 |
| BASMF | PRE#3 | BASMC018-09 | [BOLD:AAD9622](http://www.boldsystems.org/index.php/Public_BarcodeCluster?clusteruri=BOLD:AAD9622) | BAS | *Protomyctophum tenisoni* | 07-Feb-2008 | Antarctica | Scotia Sea | -50,55 | -34,05 | 648 | 0 |
| BASMF | PRE#4 | BASMC019-09 | [BOLD:AAD9622](http://www.boldsystems.org/index.php/Public_BarcodeCluster?clusteruri=BOLD:AAD9622) | BAS | *Protomyctophum tenisoni* | 07-Feb-2008 | Antarctica | Scotia Sea | -50,55 | -34,05 | 648 | 0 |
| BASMF | PRE#5 | BASMC020-09 | [BOLD:AAD9622](http://www.boldsystems.org/index.php/Public_BarcodeCluster?clusteruri=BOLD:AAD9622) | BAS | *Protomyctophum tenisoni* | 07-Feb-2008 | Antarctica | Scotia Sea | -50,55 | -34,05 | 648 | 0 |
| BASMF | Ichychthus_australia | CAOII858-09 |  | BAS | *Icichthys australis* | 13-Jan-2009 | South Georgia and the South Sandwich Islands | NW South Georgia | -53,798 | -39,07 | 0 | 0 |
| BASMF | IIC#1 | BASMC065-09 | [BOLD:AAE2761](http://www.boldsystems.org/index.php/Public_BarcodeCluster?clusteruri=BOLD:AAE2761) | BAS | *Icichthys australis* | 17-Nov-2006 | Antarctica | Scotia Sea | -57,31 | -42,85 | 652 | 0 |
| BASMF | SG09_no67_Notothenid | CAOII860-09 | [BOLD:AAA8371](http://www.boldsystems.org/index.php/Public_BarcodeCluster?clusteruri=BOLD:AAA8371) | BAS | *Trematomus vicarius* | 23-Jan-2009 | South Georgia and the South Sandwich Islands | SW South Georgia | -54,23 | -37,924 | 657 | 0 |
| BASMF | SIO#1 | BASMC063-09 | [BOLD:AAJ7118](http://www.boldsystems.org/index.php/Public_BarcodeCluster?clusteruri=BOLD:AAJ7118) | BAS | *Sio nordenskjoldii* | 28-Nov-2006 | Antarctica | Scotia Sea | -50,03 | -38,06 | 648 | 0 |
| BASMF | MEL#1 | BASMC064-09 | [BOLD:AAJ7118](http://www.boldsystems.org/index.php/Public_BarcodeCluster?clusteruri=BOLD:AAJ7118) | BAS | *Sio sp.* | 05-Feb-2008 | Antarctica | Scotia Sea | -52,62 | -39,12 | 652 | 0 |
| BASMF | SG09_no54_Notothenid | CAOII861-09 |  | BAS | *Trematomus cf. vicarius* | 21-Jan-2009 | South Georgia and the South Sandwich Islands | SE South Georgia | -54,846 | -35,23 | 0 | 0 |
| DSSAU | ADC10_86.999 #1 | DSFSG402-10 | [BOLD:AAB9650](http://www.boldsystems.org/index.php/Public_BarcodeCluster?clusteruri=BOLD:AAB9650) | SAIAB | *Electrona risso* | 25-Jan-2010 | South Africa | FAO-47 | -32,317 | 16,45 | 652 | 0 |
| DSSAU | ADC10_86.999 #2 | DSFSG413-10 | [BOLD:AAB9650](http://www.boldsystems.org/index.php/Public_BarcodeCluster?clusteruri=BOLD:AAB9650) | SAIAB | *Electrona risso* | 25-Jan-2010 | South Africa | FAO-47 | -32,317 | 16,45 | 652 | 0 |
| DSSAU | ADC10_86.999 #3 | DSFSG417-10 | [BOLD:AAB9650](http://www.boldsystems.org/index.php/Public_BarcodeCluster?clusteruri=BOLD:AAB9650) | SAIAB | *Electrona risso* | 25-Jan-2010 | South Africa | FAO-47 | -32,317 | 16,45 | 652 | 0 |
| DSSAU | ADC10_86.999 #4 | DSFSG403-10 | [BOLD:AAB9650](http://www.boldsystems.org/index.php/Public_BarcodeCluster?clusteruri=BOLD:AAB9650) | SAIAB | *Electrona risso* | 25-Jan-2010 | South Africa | FAO-47 | -32,317 | 16,45 | 652 | 0 |
| DSSAU | ADC10_86.999 #5 | DSFSG420-10 | [BOLD:AAB9650](http://www.boldsystems.org/index.php/Public_BarcodeCluster?clusteruri=BOLD:AAB9650) | SAIAB | *Electrona risso* | 25-Jan-2010 | South Africa | FAO-47 | -32,317 | 16,45 | 652 | 0 |
| DSSAU | ADC09_86.53#1 | DSFSG335-10 |  | SAIAB | *Gymnoscopelus nicholsi* | 19-Jan-2009 | South Africa |  |  |  | 648 | 0 |
| DSSAU | ADC10_86.998 #1 | DSFSF421-09 |  | SAIAB | *Lampadena speculigera* | 06-May-2010 | South Africa | FAO-47 | -35,167 | 23,183 | 652 | 0 |
| DSSAU | ADC09_86.97#1 | DSFSG360-10 | [BOLD:AAC4451](http://www.boldsystems.org/index.php/Public_BarcodeCluster?clusteruri=BOLD:AAC4451) | SAIAB | *Metelectrona ventralis* | 23-Jan-2009 | South Africa |  |  |  | 652 | 0 |
| DSSAU | ADC09_86.97#2 | DSFSF361-09 | [BOLD:AAC4451](http://www.boldsystems.org/index.php/Public_BarcodeCluster?clusteruri=BOLD:AAC4451) | SAIAB | *Metelectrona ventralis* | 23-Jan-2009 | South Africa |  |  |  | 652 | 0 |
| DSSAU | ADC09_86.97#3 | DSFSF362-09 | [BOLD:AAC4451](http://www.boldsystems.org/index.php/Public_BarcodeCluster?clusteruri=BOLD:AAC4451) | SAIAB | *Metelectrona ventralis* | 23-Jan-2009 | South Africa |  |  |  | 652 | 0 |
| DSSAU | ADC09_86.97#4 | DSFSF363-09 | [BOLD:AAC4451](http://www.boldsystems.org/index.php/Public_BarcodeCluster?clusteruri=BOLD:AAC4451) | SAIAB | *Metelectrona ventralis* | 23-Jan-2009 | South Africa |  |  |  | 652 | 0 |
| DSSAU | ADC09_86.97#5 | DSFSF364-09 | [BOLD:AAC4451](http://www.boldsystems.org/index.php/Public_BarcodeCluster?clusteruri=BOLD:AAC4451) | SAIAB | *Metelectrona ventralis* | 23-Jan-2009 | South Africa |  |  |  | 652 | 0 |
| DSSAU | ADC10_86.105 #1 | DSFSG393-10 | [BOLD:AAK8894](http://www.boldsystems.org/index.php/Public_BarcodeCluster?clusteruri=BOLD:AAK8894) | SAIAB | *Myctophum spinosum* | 09-May-2010 | South Africa | FAO-47 | -34,733 | 24,367 | 652 | 0 |
| DSSAU | ADC09_86.118#1 | DSFSF422-09 | [BOLD:AAD1092](http://www.boldsystems.org/index.php/Public_BarcodeCluster?clusteruri=BOLD:AAD1092) | SAIAB | *Scopelopsis multipunctatus* | 01-Jul-2009 | South Africa |  | -33,028 | 27,929 | 652 | 0 |
| DSSAU | ADC09_86.118#2 | DSFSF423-09 | [BOLD:AAD1092](http://www.boldsystems.org/index.php/Public_BarcodeCluster?clusteruri=BOLD:AAD1092) | SAIAB | *Scopelopsis multipunctatus* | 01-Jul-2009 | South Africa |  | -33,028 | 27,929 | 652 | 0 |
| DSSAU | ADC09_86.119 #2 | DSFSF337-09 | [BOLD:AAC7164](http://www.boldsystems.org/index.php/Public_BarcodeCluster?clusteruri=BOLD:AAC7164) | SAIAB | *Symbolophorus barnardi* | 20-Jan-2009 | South Africa |  |  |  | 652 | 0 |
| DSSAU | ADC09_86.119#1 | DSFSF336-09 | [BOLD:AAC7164](http://www.boldsystems.org/index.php/Public_BarcodeCluster?clusteruri=BOLD:AAC7164) | SAIAB | *Symbolophorus barnardi* | 20-Jan-2009 | South Africa |  |  |  | 652 | 0 |
| DSSAU | ADC09_86.119#3 | DSFSF343-09 | [BOLD:AAC7164](http://www.boldsystems.org/index.php/Public_BarcodeCluster?clusteruri=BOLD:AAC7164) | SAIAB | *Symbolophorus barnardi* | 20-Jan-2009 | South Africa |  |  |  | 652 | 0 |
| DSSAU | ACD07_86.120 #1 | DSFSE476-08 | [BOLD:AAE2682](http://www.boldsystems.org/index.php/Public_BarcodeCluster?clusteruri=BOLD:AAE2682) | SAIAB | *Symbolophorus boops* | 12-Oct-2007 | South Africa |  | -34,383 | 26,067 | 652 | 0 |
| DSSAU | ACD07_86.120 #2 | DSFSE477-08 | [BOLD:AAE2682](http://www.boldsystems.org/index.php/Public_BarcodeCluster?clusteruri=BOLD:AAE2682) | SAIAB | *Symbolophorus boops* | 12-Oct-2007 | South Africa |  | -34,383 | 26,067 | 652 | 0 |
| DSSAU | ACD07_86.120 #3 | DSFSE478-08 | [BOLD:AAE2682](http://www.boldsystems.org/index.php/Public_BarcodeCluster?clusteruri=BOLD:AAE2682) | SAIAB | *Symbolophorus boops* | 12-Oct-2007 | South Africa |  | -34,383 | 26,067 | 652 | 0 |
| DSSAU | ACD07_86.120 #4 | DSFSE479-08 | [BOLD:AAE2682](http://www.boldsystems.org/index.php/Public_BarcodeCluster?clusteruri=BOLD:AAE2682) | SAIAB | *Symbolophorus boops* | 12-Oct-2007 | South Africa |  | -34,383 | 26,067 | 652 | 0 |
| DSSAU | ACD07_86.120 #5 | DSFSE480-08 | [BOLD:AAE2682](http://www.boldsystems.org/index.php/Public_BarcodeCluster?clusteruri=BOLD:AAE2682) | SAIAB | *Symbolophorus boops* | 12-Oct-2007 | South Africa |  | -34,383 | 26,067 | 652 | 0 |
| DSSAU | ADC10_86.40 #1 | DSFSG260-10 | [BOLD:AAE2682](http://www.boldsystems.org/index.php/Public_BarcodeCluster?clusteruri=BOLD:AAE2682) | SAIAB | *Symbolophorus boops* | 01-Aug-2007 | South Africa |  | -29,705 | 31,617 | 569 | 0 |
| FISCO | KUL_Art_sko_AAV3FF_00244 | FISCO151-10 | [BOLD:AAB5322](http://www.boldsystems.org/index.php/Public_BarcodeCluster?clusteruri=BOLD:AAB5322) | KUL | *Artedidraco skottsbergi* | 2/4/2006 | Antarctica |  | -65,001 | 50,036 | 652 | 0 |
| FISCO | KUL_Bat_ant_PS65FF_13171 | FISCO189-10 | [BOLD:AAB8351](http://www.boldsystems.org/index.php/Public_BarcodeCluster?clusteruri=BOLD:AAB8351) | KUL | *Bathylagus antarcticus* | 04/22/04 | Antarctica | Lazarev Sea | -64,000 | -0,0038 | 647 | 0 |
| FISCO | KUL_Bat_ant_PS65FF_13190 | FISCO186-10 | [BOLD:AAB8351](http://www.boldsystems.org/index.php/Public_BarcodeCluster?clusteruri=BOLD:AAB8351) | KUL | *Bathylagus antarcticus* | 04/23/04 | Antarctica | Lazarev Sea | -63,000 | 0,0031 | 633 | 0 |
| FISCO | KUL_Bat_ant_PS65FF_13191 | FISCO187-10 | [BOLD:AAB8351](http://www.boldsystems.org/index.php/Public_BarcodeCluster?clusteruri=BOLD:AAB8351) | KUL | *Bathylagus antarcticus* | 04/23/04 | Antarctica | Lazarev Sea | -63,000 | 0,0031 | 629 | 0 |
| FISCO | KUL_Bat_ant_PS69_FF_0403 | FISCO180-10 | [BOLD:AAB8351](http://www.boldsystems.org/index.php/Public_BarcodeCluster?clusteruri=BOLD:AAB8351) | KUL | *Bathylagus antarcticus* | 6/6/2006 | Antarctica | Lazarev Sea | -67,963 | 3,0266 | 632 | 0 |
| FISCO | KUL_Bat_ant_PS69_FF_0406 | FISCO188-10 | [BOLD:AAB8351](http://www.boldsystems.org/index.php/Public_BarcodeCluster?clusteruri=BOLD:AAB8351) | KUL | *Bathylagus antarcticus* | 6/6/2006 | Antarctica | Lazarev Sea | -67,963 | 3,0266 | 633 | 0 |
| FISCO | KUL_Bat_ant_PS69_FF_0407 | FISCO185-10 | [BOLD:AAB8351](http://www.boldsystems.org/index.php/Public_BarcodeCluster?clusteruri=BOLD:AAB8351) | KUL | *Bathylagus antarcticus* | 6/6/2006 | Antarctica | Lazarev Sea | -67,963 | 3,0266 | 644 | 0 |
| FISCO | KUL_Bat_ant_PS69_FF_0929 | FISCO058-10 | [BOLD:AAB8351](http://www.boldsystems.org/index.php/Public_BarcodeCluster?clusteruri=BOLD:AAB8351) | KUL | *Bathylagus antarcticus* | 7/23/2006 | Antarctica | Lazarev Sea | -61,974 | -0,026 | 652 | 0 |
| FISCO | KUL_Bat_ant_PS69_FF_1682 | FISCO059-10 | [BOLD:AAB8351](http://www.boldsystems.org/index.php/Public_BarcodeCluster?clusteruri=BOLD:AAB8351) | KUL | *Bathylagus antarcticus* | 8/13/2006 | Antarctica | Lazarev Sea | -59,905 | 2,8783 | 652 | 0 |
| FISCO | KUL_Bat_ant_PS69_FF_1684 | FISCO060-10 | [BOLD:AAB8351](http://www.boldsystems.org/index.php/Public_BarcodeCluster?clusteruri=BOLD:AAB8351) | KUL | *Bathylagus antarcticus* | 8/13/2006 | Antarctica | Lazarev Sea | -59,905 | 2,8783 | 652 | 0 |
| FISCO | KUL_Bat_ant_PS69FF_0422 | FISCO061-10 | [BOLD:AAB8351](http://www.boldsystems.org/index.php/Public_BarcodeCluster?clusteruri=BOLD:AAB8351) | KUL | *Bathylagus antarcticus* | 6/6/2006 | Antarctica | Lazarev Sea | -67,963 | 3,0266 | 652 | 0 |
| FISCO | KUL_Bat_ant_PS69FF_0496 | FISCO062-10 | [BOLD:AAB8351](http://www.boldsystems.org/index.php/Public_BarcodeCluster?clusteruri=BOLD:AAB8351) | KUL | *Bathylagus antarcticus* | 7/6/2006 | Antarctica | Lazarev Sea | -68,534 | 2,9295 | 652 | 0 |
| FISCO | KUL_Bat_ant_PS69FF_1622 | FISCO063-10 | [BOLD:AAB8351](http://www.boldsystems.org/index.php/Public_BarcodeCluster?clusteruri=BOLD:AAB8351) | KUL | *Bathylagus antarcticus* | 8/11/2006 | Antarctica | Lazarev Sea | -60,470 | 0,0741 | 652 | 0 |
| FISCO | KUL_Bat_sp._AAV3FF_00321 | FISCO157-10 | [BOLD:AAC3458](http://www.boldsystems.org/index.php/Public_BarcodeCluster?clusteruri=BOLD:AAC3458) | KUL | *Bathydraco sp.* | 2/19/2006 | Antarctica |  | -65,501 | 70,001 | 619 | 0 |
| FISCO | KUL_Bat_sp._AAV3FF_00322 | FISCO158-10 |  | KUL |  | 2/19/2006 | Antarctica |  | -65,501 | 69,997 | 0 | 0 |
| FISCO | KUL_Bat_sp._AAV3FF_00325 | FISCO161-10 | [BOLD:AAC3458](http://www.boldsystems.org/index.php/Public_BarcodeCluster?clusteruri=BOLD:AAC3458) | KUL | *Bathydraco sp.* | 2/19/2006 | Antarctica |  | -65,501 | 69,997 | 644 | 0 |
| FISCO | KUL_Bat_sp._AAV3FF_00347 | FISCO164-10 | [BOLD:AAC3458](http://www.boldsystems.org/index.php/Public_BarcodeCluster?clusteruri=BOLD:AAC3458) | KUL | *Bathydraco sp.* | 2/21/2006 | Antarctica |  | -67,045 | 74,968 | 650 | 0 |
| FISCO | KUL_Bat_sp._AAV3FF_00411 | FISCO175-10 | [BOLD:AAC3458](http://www.boldsystems.org/index.php/Public_BarcodeCluster?clusteruri=BOLD:AAC3458) | KUL | *Bathydraco sp.* | 2/26/2006 | Antarctica |  | -65,002 | 79,988 | 632 | 0 |
| FISCO | KUL_Ben_gla_26311 | FISCO096-10 |  | KUL |  |  | Antarctica |  |  |  | 0 | 0 |
| FISCO | KUL_Ben_gla_26325 | FISCO097-10 | [BOLD:AAC5632](http://www.boldsystems.org/index.php/Public_BarcodeCluster?clusteruri=BOLD:AAC5632) | KUL | *Benthosema glaciale* |  | Antarctica |  |  |  | 626 | 0 |
| FISCO | KUL_Ben_gla_26339 | FISCO098-10 | [BOLD:AAC5632](http://www.boldsystems.org/index.php/Public_BarcodeCluster?clusteruri=BOLD:AAC5632) | KUL | *Benthosema glaciale* |  | Antarctica |  |  |  | 648 | 0 |
| FISCO | KUL_Chi_sp._AAV3FF_00283 | FISCO156-10 |  | KUL |  | 2/11/2006 | Antarctica |  | -66,939 | 59,942 | 0 | 0 |
| FISCO | KUL_Chi_sp._AAV3FF_00340 | FISCO163-10 |  | KUL |  | 2/20/2006 | Antarctica |  | -67,181 | 69,977 | 0 | 0 |
| FISCO | KUL_Chi_sp._AAV3FF_00352 | FISCO170-10 |  | KUL |  | 2/21/2006 | Antarctica |  | -67,045 | 74,968 | 0 | 0 |
| FISCO | KUL_Chi_sp._AAV3FF_00355 | FISCO172-10 |  | KUL |  | 2/21/2006 | Antarctica |  | -67,045 | 74,968 | 0 | 0 |
| FISCO | KUL_Cry_ant_AAV3FF_00358 | FISCO166-10 | [BOLD:ABY5228](http://www.boldsystems.org/index.php/Public_BarcodeCluster?clusteruri=BOLD:ABY5228) | KUL | *Cryodraco antarcticus* | 2/23/2006 | Antarctica |  | -62,792 | 75,008 | 619 | 0 |
| FISCO | KUL_Cry_ant_AAV3FF_00373 | FISCO167-10 |  | KUL |  | 2/24/2006 | Antarctica |  | -62,23 | 80,011 | 0 | 0 |
| FISCO | KUL_Cyc_mic_PS69_FF_1695 | FISCO073-10 |  | KUL |  | 8/13/2006 | Antarctica |  | -59,905 | 2,8783 | 0 | 0 |
| FISCO | KUL_Cyc_mic_PS69_FF_1702 | FISCO069-10 |  | KUL |  | 8/13/2006 | Antarctica |  | -59,905 | 2,8783 | 0 | 0 |
| FISCO | KUL_Cyc_mic_PS69_FF_1703 | FISCO070-10 |  | KUL |  | 8/13/2006 | Antarctica |  | -59,905 | 2,8783 | 0 | 0 |
| FISCO | KUL_Cyc_mic_PS69_FF_1704 | FISCO071-10 |  | KUL |  | 8/13/2006 | Antarctica |  | -59,905 | 2,8783 | 0 | 0 |
| FISCO | KUL_Cyc_mic_PS69_FF_1705 | FISCO072-10 |  | KUL |  | 8/13/2006 | Antarctica |  | -59,905 | 2,8783 | 0 | 0 |
| FISCO | KUL_Cyg_maw_AAV3FF_00324 | FISCO160-10 |  | KUL |  | 2/19/2006 | Antarctica |  | -65,501 | 69,997 | 0 | 0 |
| FISCO | KUL_Cyg_maw_AAV3FF_00420 | FISCO176-10 | [BOLD:AAC9735](http://www.boldsystems.org/index.php/Public_BarcodeCluster?clusteruri=BOLD:AAC9735) | KUL | *Cygnodraco mawsoni* | 2/27/2006 | Antarctica |  | -66,025 | 80,018 | 595 | 0 |
| FISCO | KUL_Dia_raf_27621 | FISCO099-10 | [BOLD:AAC7800](http://www.boldsystems.org/index.php/Public_BarcodeCluster?clusteruri=BOLD:AAC7800) | KUL | *Diaphus rafinesquii* |  | Antarctica |  |  |  | 629 | 0 |
| FISCO | KUL_Dia_raf_27635 | FISCO100-10 | [BOLD:AAC7800](http://www.boldsystems.org/index.php/Public_BarcodeCluster?clusteruri=BOLD:AAC7800) | KUL | *Diaphus rafinesquii* |  | Antarctica |  |  |  | 651 | 0 |
| FISCO | KUL_Dia_raf_27649 | FISCO101-10 | [BOLD:AAC7800](http://www.boldsystems.org/index.php/Public_BarcodeCluster?clusteruri=BOLD:AAC7800) | KUL | *Diaphus rafinesquii* |  | Antarctica |  |  |  | 645 | 0 |
| FISCO | KUL_Ele_ant_AAV3FF_00201 | FISCO088-10 | [BOLD:AAB3737](http://www.boldsystems.org/index.php/Public_BarcodeCluster?clusteruri=BOLD:AAB3737) | KUL | *Electrona antarctica* | 2/2/2006 | Antarctica | Cosmonaut Sea | -62,001 | 50,028 | 648 | 745 |
| FISCO | KUL_Ele_ant_AAV3FF_00202 | FISCO089-10 | [BOLD:AAB3737](http://www.boldsystems.org/index.php/Public_BarcodeCluster?clusteruri=BOLD:AAB3737) | KUL | *Electrona antarctica* | 2/2/2006 | Antarctica | Cosmonaut Sea | -62,001 | 50,028 | 648 | 745 |
| FISCO | KUL_Ele_ant_AAV3FF_00203 | FISCO090-10 | [BOLD:AAB3737](http://www.boldsystems.org/index.php/Public_BarcodeCluster?clusteruri=BOLD:AAB3737) | KUL | *Electrona antarctica* | 2/2/2006 | Antarctica | Cosmonaut Sea | -62,001 | 50,028 | 637 | 0 |
| FISCO | KUL_Ele_ant_AAV3FF_00204 | FISCO091-10 | [BOLD:AAB3737](http://www.boldsystems.org/index.php/Public_BarcodeCluster?clusteruri=BOLD:AAB3737) | KUL | *Electrona antarctica* | 2/2/2006 | Antarctica | Cosmonaut Sea | -62,001 | 50,028 | 648 | 745 |
| FISCO | KUL_Ele_ant_AAV3FF_00278 | FISCO092-10 | [BOLD:AAB3737](http://www.boldsystems.org/index.php/Public_BarcodeCluster?clusteruri=BOLD:AAB3737) | KUL | *Electrona antarctica* | 2/10/2006 | Antarctica | Cooperation Sea | -65,501 | 60,029 | 648 | 745 |
| FISCO | KUL_Ele_ant_AAV3FF_00367 | FISCO093-10 | [BOLD:AAB3737](http://www.boldsystems.org/index.php/Public_BarcodeCluster?clusteruri=BOLD:AAB3737) | KUL | *Electrona antarctica* | 2/24/2006 | Antarctica | Cooperation Sea | -61,663 | 80,029 | 648 | 745 |
| FISCO | KUL_Ele_ant_AAV3FF_00369 | FISCO094-10 | [BOLD:AAB3737](http://www.boldsystems.org/index.php/Public_BarcodeCluster?clusteruri=BOLD:AAB3737) | KUL | *Electrona antarctica* | 2/24/2006 | Antarctica | Cooperation Sea | -61,663 | 80,029 | 648 | 745 |
| FISCO | KUL_Ele_ant_AAV3FF_00388 | FISCO095-10 | [BOLD:AAB3737](http://www.boldsystems.org/index.php/Public_BarcodeCluster?clusteruri=BOLD:AAB3737) | KUL | *Electrona antarctica* | 2/26/2006 | Antarctica | Cooperation Sea | -64,495 | 79,999 | 648 | 745 |
| FISCO | KUL_Ele_ant_PS65_FF_10700 | FISCO137-10 | [BOLD:AAB3737](http://www.boldsystems.org/index.php/Public_BarcodeCluster?clusteruri=BOLD:AAB3737) | KUL | *Electrona antarctica* | 04/07/04 | Antarctica | Lazarev Sea | -64,337 | -6,0091 | 648 | 0 |
| FISCO | KUL_Ele_ant_PS65_FF_10701 | FISCO138-10 | [BOLD:AAB3737](http://www.boldsystems.org/index.php/Public_BarcodeCluster?clusteruri=BOLD:AAB3737) | KUL | *Electrona antarctica* | 04/07/04 | Antarctica | Lazarev Sea | -64,337 | -6,0091 | 639 | 745 |
| FISCO | KUL_Ele_ant_PS65_FF_10722 | FISCO139-10 | [BOLD:AAB3737](http://www.boldsystems.org/index.php/Public_BarcodeCluster?clusteruri=BOLD:AAB3737) | KUL | *Electrona antarctica* | 04/08/04 | Antarctica | Lazarev Sea | -66,337 | -5,9996 | 648 | 0 |
| FISCO | KUL_Ele_ant_PS65_FF_10724 | FISCO140-10 |  | KUL | *Electrona antarctica* | 04/08/04 | Antarctica | Lazarev Sea | -66,337 | -5,9996 | 0 | 0 |
| FISCO | KUL_Ele_ant_PS65_FF_10744 | FISCO141-10 | [BOLD:AAB3737](http://www.boldsystems.org/index.php/Public_BarcodeCluster?clusteruri=BOLD:AAB3737) | KUL | *Electrona antarctica* | 04/08/04 | Antarctica | Lazarev Sea | -67,007 | -6,0001 | 648 | 745 |
| FISCO | KUL_Ele_ant_PS65_FF_10850 | FISCO142-10 |  | KUL | *Electrona antarctica* | 04/13/04 | Antarctica | Lazarev Sea | -66,677 | -3,9923 | 0 | 745 |
| FISCO | KUL_Ele_ant_PS69_FF_0291 | FISCO064-10 | [BOLD:AAB3737](http://www.boldsystems.org/index.php/Public_BarcodeCluster?clusteruri=BOLD:AAB3737) | KUL | *Electrona antarctica* | 7/4/2006 | Antarctica | Lazarev Sea | -66,498 | 3,0281 | 648 | 745 |
| FISCO | KUL_Ele_ant_PS69_FF_0379 | FISCO065-10 | [BOLD:AAB3737](http://www.boldsystems.org/index.php/Public_BarcodeCluster?clusteruri=BOLD:AAB3737) | KUL | *Electrona antarctica* | 6/6/2006 | Antarctica | Lazarev Sea | -67,963 | 3,0266 | 648 | 745 |
| FISCO | KUL_Ele_ant_PS69_FF_0381 | FISCO066-10 | [BOLD:AAB3737](http://www.boldsystems.org/index.php/Public_BarcodeCluster?clusteruri=BOLD:AAB3737) | KUL | *Electrona antarctica* | 6/6/2006 | Antarctica | Lazarev Sea | -67,963 | 3,0266 | 648 | 745 |
| FISCO | KUL_Ele_ant_PS69_FF_0387 | FISCO067-10 | [BOLD:AAB3737](http://www.boldsystems.org/index.php/Public_BarcodeCluster?clusteruri=BOLD:AAB3737) | KUL | *Electrona antarctica* | 6/6/2006 | Antarctica | Lazarev Sea | -67,963 | 3,0266 | 648 | 745 |
| FISCO | KUL_Ele_ant_PS69_FF_0393 | FISCO068-10 | [BOLD:AAB3737](http://www.boldsystems.org/index.php/Public_BarcodeCluster?clusteruri=BOLD:AAB3737) | KUL | *Electrona antarctica* | 6/6/2006 | Antarctica | Lazarev Sea | -67,963 | 3,0266 | 648 | 745 |
| FISCO | KUL_Ele_ris_26353 | FISCO102-10 | [BOLD:AAB9650](http://www.boldsystems.org/index.php/Public_BarcodeCluster?clusteruri=BOLD:AAB9650) | KUL | *Electrona risso* |  | Antarctica |  |  |  | 607 | 0 |
| FISCO | KUL_Ele_ris_27473 | FISCO103-10 | [BOLD:AAB9650](http://www.boldsystems.org/index.php/Public_BarcodeCluster?clusteruri=BOLD:AAB9650) | KUL | *Electrona risso* |  | Antarctica |  |  |  | 614 | 0 |
| FISCO | KUL_Ele_ris_27565 | FISCO104-10 | [BOLD:AAB9650](http://www.boldsystems.org/index.php/Public_BarcodeCluster?clusteruri=BOLD:AAB9650) | KUL | *Electrona risso* |  | Antarctica |  |  |  | 614 | 0 |
| FISCO | KUL_Ele_ris_27593 | FISCO105-10 | [BOLD:AAB9650](http://www.boldsystems.org/index.php/Public_BarcodeCluster?clusteruri=BOLD:AAB9650) | KUL | *Electrona risso* |  | Antarctica |  |  |  | 523 | 0 |
| FISCO | KUL_Ele_ris_27607 | FISCO106-10 | [BOLD:AAB9650](http://www.boldsystems.org/index.php/Public_BarcodeCluster?clusteruri=BOLD:AAB9650) | KUL | *Electrona risso* |  | Antarctica |  |  |  | 605 | 0 |
| FISCO | KUL_Ger_aus_AAV3FF_00260 | FISCO152-10 | [BOLD:AAB3172](http://www.boldsystems.org/index.php/Public_BarcodeCluster?clusteruri=BOLD:AAB3172) | KUL | *Gerlachea australis* | 2/5/2006 | Antarctica |  | -66,335 | 50,17 | 651 | 0 |
| FISCO | KUL_Gym_acu_AAV3FF_00174 | FISCO149-10 |  | KUL |  | 1/30/2006 | Antarctica |  | -67,944 | 40,06 | 0 | 0 |
| FISCO | KUL_Gym_acu_AAV3FF_00261 | FISCO153-10 |  | KUL |  | 2/5/2006 | Antarctica |  | -66,335 | 50,17 | 0 | 0 |
| FISCO | KUL_Gym_acu_AAV3FF_00341 | FISCO168-10 |  | KUL |  | 2/20/2006 | Antarctica |  | -67,181 | 69,977 | 0 | 0 |
| FISCO | KUL_Gym_bra_PS69_FF_1523 | FISCO074-10 | [BOLD:AAB5232](http://www.boldsystems.org/index.php/Public_BarcodeCluster?clusteruri=BOLD:AAB5232) | KUL | *Gymnoscopelus braueri* | 8/10/2006 | Antarctica | Lazarev Sea | -60,021 | -0,0155 | 648 | 745 |
| FISCO | KUL_Gym_bra_PS69_FF_1524 | FISCO075-10 | [BOLD:AAB6899](http://www.boldsystems.org/index.php/Public_BarcodeCluster?clusteruri=BOLD:AAB6899) | KUL | *Gymnoscopelus opisthopterusi* | 8/10/2006 | Antarctica | Lazarev Sea | -60,021 | -0,0155 | 648 | 0 |
| FISCO | KUL_Gym_bra_PS69_FF_1796 | FISCO076-10 | [BOLD:AAB5232](http://www.boldsystems.org/index.php/Public_BarcodeCluster?clusteruri=BOLD:AAB5232) | KUL | *Gymnoscopelus braueri* | 8/14/2006 | Antarctica | Bouvet Island | -56,014 | 3,3687 | 648 | 745 |
| FISCO | KUL_Gym_bra_PS69_FF_1797 | FISCO077-10 | [BOLD:AAB5232](http://www.boldsystems.org/index.php/Public_BarcodeCluster?clusteruri=BOLD:AAB5232) | KUL | *Gymnoscopelus braueri* | 8/14/2006 | Antarctica | Bouvet Island | -56,014 | 3,3687 | 648 | 745 |
| FISCO | KUL_Gym_sp_PS69_FF_1673 | FISCO081-10 | [BOLD:AAB6899](http://www.boldsystems.org/index.php/Public_BarcodeCluster?clusteruri=BOLD:AAB6899) | KUL | *Gymnoscopelus opisthopterus* | 8/13/2006 | Antarctica | Lazarev Sea | -59,905 | 2,8783 | 648 | 745 |
| FISCO | KUL_Gym_sp_PS69_FF_1675 | FISCO080-10 | [BOLD:AAB5232](http://www.boldsystems.org/index.php/Public_BarcodeCluster?clusteruri=BOLD:AAB5232) | KUL | *Gymnoscopelus braueri* | 8/13/2006 | Antarctica | Lazarev Sea | -59,905 | 2,8783 | 648 | 745 |
| FISCO | KUL_Gym_sp_PS69_FF_1677 | FISCO079-10 | [BOLD:AAB6899](http://www.boldsystems.org/index.php/Public_BarcodeCluster?clusteruri=BOLD:AAB6899) | KUL | *Gymnoscopelus opisthopterus* | 8/13/2006 | Antarctica | Lazarev Sea | -59,905 | 2,8783 | 648 | 745 |
| FISCO | KUL_Gym_sp_PS69_FF_1679 | FISCO078-10 | [BOLD:AAB6899](http://www.boldsystems.org/index.php/Public_BarcodeCluster?clusteruri=BOLD:AAB6899) | KUL | *Gymnoscopelus opisthopterus* | 8/13/2006 | Antarctica | Lazarev Sea | -59,905 | 2,8783 | 648 | 745 |
| FISCO | KUL_Hyg_hyg_27663 | FISCO107-10 | [BOLD:AAC6495](http://www.boldsystems.org/index.php/Public_BarcodeCluster?clusteruri=BOLD:AAC6495) | KUL | *Hygophum hygomii* |  | Antarctica |  |  |  | 615 | 0 |
| FISCO | KUL_Hyg_hyg_27677 | FISCO108-10 | [BOLD:AAC5632](http://www.boldsystems.org/index.php/Public_BarcodeCluster?clusteruri=BOLD:AAC5632) | KUL | *Benthosema glaciale* |  | Antarctica |  |  |  | 640 | 0 |
| FISCO | KUL_Hyg_hyg_27691 | FISCO109-10 | [BOLD:AAC6495](http://www.boldsystems.org/index.php/Public_BarcodeCluster?clusteruri=BOLD:AAC6495) | KUL | *Hygophum hygomii* |  | Antarctica |  |  |  | 648 | 0 |
| FISCO | KUL_JCR200_106_2_PRY_1 | FISCO030-10 |  | KUL |  | 3/25/2009 | Antarctica |  |  |  | 0 | 0 |
| FISCO | KUL_JCR200_115_1_GYF_22 | FISCO036-10 | [BOLD:ACE4884](http://www.boldsystems.org/index.php/Public_BarcodeCluster?clusteruri=BOLD:ACE4884) | KUL | *Gymnoscopelus fraseri* | 3/27/2009 | Antarctica | Scotia Sea | -56,806 | -42,232 | 648 | 0 |
| FISCO | KUL_JCR200_127_2_GYJ_7 | FISCO035-10 |  | KUL |  | 3/27/2009 | Antarctica |  | -56,762 | -42,272 | 0 | 0 |
| FISCO | KUL_JCR200_128_1_ELC_1 | FISCO002-10 | [BOLD:AAB8433](http://www.boldsystems.org/index.php/Public_BarcodeCluster?clusteruri=BOLD:AAB8433) | KUL | *Electrona carlsbergi* | 3/28/2009 | Antarctica | Scotia Sea | -56,768 | -42,180 | 648 | 0 |
| FISCO | KUL_JCR200_128_1_ELC_2 | FISCO003-10 |  | KUL | *Electrona carlsbergi* | 3/28/2009 | Antarctica | Scotia Sea | -56,768 | -42,180 | 0 | 0 |
| FISCO | KUL_JCR200_141_1_GYF_4 | FISCO037-10 | [BOLD:ACE4884](http://www.boldsystems.org/index.php/Public_BarcodeCluster?clusteruri=BOLD:ACE4884) | KUL | *Gymnoscopelus fraseri* | 3/30/2009 | Antarctica | Scotia Sea | -55,265 | -41,347 | 648 | 745 |
| FISCO | KUL_JCR200_17_1_PRY_41 | FISCO026-10 | [BOLD:AAD9636](http://www.boldsystems.org/index.php/Public_BarcodeCluster?clusteruri=BOLD:AAD9636) | KUL | *Protomyctophum choriodon* | 3/16/2009 | Antarctica | South Orkney Islands | -60,493 | -48,228 | 648 | 0 |
| FISCO | KUL_JCR200_17_2_GYN_68 | FISCO043-10 | [BOLD:AAB0899](http://www.boldsystems.org/index.php/Public_BarcodeCluster?clusteruri=BOLD:AAB0899) | KUL | *Gymnoscopelus nicholsi* | 3/16/2009 | Antarctica | South Orkney Islands | -60,488 | -48,266 | 648 | 0 |
| FISCO | KUL_JCR200_17_2_PRY_69 | FISCO027-10 |  | KUL |  | 3/16/2009 | Antarctica |  | -60,488 | -48,266 | 0 | 0 |
| FISCO | KUL_JCR200_18_1_GYO_23 | FISCO032-10 | [BOLD:AAB6899](http://www.boldsystems.org/index.php/Public_BarcodeCluster?clusteruri=BOLD:AAB6899) | KUL | *Gymnoscopelus opisthopterus* |  | Antarctica | Scotia Sea |  |  | 625 | 0 |
| FISCO | KUL_JCR200_185_2_GYF_36 | FISCO038-10 | [BOLD:ACE4884](http://www.boldsystems.org/index.php/Public_BarcodeCluster?clusteruri=BOLD:ACE4884) | KUL | *Gymnoscopelus fraseri* | 4/4/2009 | Antarctica | South Georgia | -52,822 | -39,902 | 648 | 745 |
| FISCO | KUL_JCR200_195_8_GYF_ | FISCO039-10 | [BOLD:ACE4884](http://www.boldsystems.org/index.php/Public_BarcodeCluster?clusteruri=BOLD:ACE4884) | KUL | *Gymnoscopelus fraseri* |  | Antarctica | Scotia Sea |  |  | 640 | 745 |
| FISCO | KUL_JCR200_225_1_KRA_31 | FISCO006-10 | [BOLD:AAC6875](http://www.boldsystems.org/index.php/Public_BarcodeCluster?clusteruri=BOLD:AAC6875) | KUL | *Krefftichthys anderssoni* | 4/9/2009 | Antarctica | Southern Atlantic Ocean | -50,047 | -33,900 | 652 | 0 |
| FISCO | KUL_JCR200_225_1_KRA_32 | FISCO007-10 | [BOLD:AAC6875](http://www.boldsystems.org/index.php/Public_BarcodeCluster?clusteruri=BOLD:AAC6875) | KUL | *Krefftichthys anderssoni* | 4/9/2009 | Antarctica | Southern Atlantic Ocean | -50,047 | -33,900 | 652 | 0 |
| FISCO | KUL_JCR200_225_1_KRA_33 | FISCO008-10 | [BOLD:AAC6875](http://www.boldsystems.org/index.php/Public_BarcodeCluster?clusteruri=BOLD:AAC6875) | KUL | *Krefftichthys anderssoni* | 4/9/2009 | Antarctica | Southern Atlantic Ocean | -50,047 | -33,900 | 652 | 0 |
| FISCO | KUL_JCR200_225_1_KRA_34 | FISCO009-10 | [BOLD:AAC6875](http://www.boldsystems.org/index.php/Public_BarcodeCluster?clusteruri=BOLD:AAC6875) | KUL | *Krefftichthys anderssoni* | 4/9/2009 | Antarctica | Southern Atlantic Ocean | -50,047 | -33,900 | 652 | 0 |
| FISCO | KUL_JCR200_225_1_KRA_35 | FISCO010-10 | [BOLD:AAC6875](http://www.boldsystems.org/index.php/Public_BarcodeCluster?clusteruri=BOLD:AAC6875) | KUL | *Krefftichthys anderssoni* | 4/9/2009 | Antarctica | Southern Atlantic Ocean | -50,047 | -33,900 | 652 | 0 |
| FISCO | KUL_JCR200_225_2_PRP_11 | FISCO031-10 | [BOLD:ACF2373](http://www.boldsystems.org/index.php/Public_BarcodeCluster?clusteruri=BOLD:ACF2373) | KUL | *Protomyctophum parallelum* | 4/10/2009 | Antarctica | Southern Atlantic Ocean | -50,041 | -33,828 | 652 | 0 |
| FISCO | KUL_JCR200_226_1_PRA_16 | FISCO018-10 |  | KUL | *Protomyctophum andriashevi* | 4/10/2009 | Antarctica | Southern Atlantic Ocean | -50,047 | -33,743 | 0 | 0 |
| FISCO | KUL_JCR200_226_1_PRM_28 | FISCO011-10 |  | KUL | *Protomyctophum bolini* | 4/10/2009 | Antarctica | Southern Atlantic Ocean | -50,047 | -33,743 | 0 | 0 |
| FISCO | KUL_JCR200_226_1_PRM_29 | FISCO012-10 |  | KUL | *Protomyctophum bolini* | 4/10/2009 | Antarctica | Southern Atlantic Ocean | -50,047 | -33,743 | 0 | 0 |
| FISCO | KUL_JCR200_226_1_PRM_30 | FISCO013-10 | [BOLD:AAC7885](http://www.boldsystems.org/index.php/Public_BarcodeCluster?clusteruri=BOLD:AAC7885) | KUL | *Protomyctophum bolini* | 4/10/2009 | Antarctica | Southern Atlantic Ocean | -50,047 | -33,743 | 648 | 0 |
| FISCO | KUL_JCR200_226_1_PRM_31 | FISCO014-10 |  | KUL | *Protomyctophum bolini* | 4/10/2009 | Antarctica | Southern Atlantic Ocean | -50,047 | -33,743 | 0 | 0 |
| FISCO | KUL_JCR200_226_1_PRM_32 | FISCO015-10 |  | KUL | *Protomyctophum bolini* | 4/10/2009 | Antarctica | Southern Atlantic Ocean | -50,047 | -33,743 | 0 | 0 |
| FISCO | KUL_JCR200_226_2_ELS_8 | FISCO041-10 |  | KUL |  | 4/10/2009 | Antarctica |  | -50,044 | -33,666 | 0 | 0 |
| FISCO | KUL_JCR200_226_2_PRE_34 | FISCO021-10 | [BOLD:AAD9622](http://www.boldsystems.org/index.php/Public_BarcodeCluster?clusteruri=BOLD:AAD9622) | KUL | *Protomyctophum tenisoni* | 4/10/2009 | Antarctica | Southern Atlantic Ocean | -50,044 | -33,666 | 648 | 0 |
| FISCO | KUL_JCR200_226_2_PRE_35 | FISCO022-10 | [BOLD:AAD9622](http://www.boldsystems.org/index.php/Public_BarcodeCluster?clusteruri=BOLD:AAD9622) | KUL | *Protomyctophum tenisoni* | 4/10/2009 | Antarctica | Southern Atlantic Ocean | -50,044 | -33,666 | 648 | 0 |
| FISCO | KUL_JCR200_226_2_PRE_36 | FISCO023-10 | [BOLD:AAD9622](http://www.boldsystems.org/index.php/Public_BarcodeCluster?clusteruri=BOLD:AAD9622) | KUL | *Protomyctophum tenisoni* | 4/10/2009 | Antarctica | Southern Atlantic Ocean | -50,044 | -33,666 | 648 | 0 |
| FISCO | KUL_JCR200_226_2_PRE_37 | FISCO024-10 | [BOLD:AAD9622](http://www.boldsystems.org/index.php/Public_BarcodeCluster?clusteruri=BOLD:AAD9622) | KUL | *Protomyctophum tenisoni* | 4/10/2009 | Antarctica | Southern Atlantic Ocean | -50,044 | -33,666 | 648 | 0 |
| FISCO | KUL_JCR200_226_2_PRE_38 | FISCO025-10 | [BOLD:AAD9622](http://www.boldsystems.org/index.php/Public_BarcodeCluster?clusteruri=BOLD:AAD9622) | KUL | *Protomyctophum tenisoni* | 4/10/2009 | Antarctica | Southern Atlantic Ocean | -50,044 | -33,666 | 652 | 0 |
| FISCO | KUL_JCR200_227_1_GYB_6 | FISCO034-10 | [BOLD:AAC5123](http://www.boldsystems.org/index.php/Public_BarcodeCluster?clusteruri=BOLD:AAC5123) | KUL | *Gymnoscopelus braueri* |  | Antarctica | Scotia Sea |  |  | 648 | 745 |
| FISCO | KUL_JCR200_227_2_ELS_86 | FISCO042-10 |  | KUL |  | 4/10/2009 | Antarctica |  | -50,050 | -33,512 | 0 | 0 |
| FISCO | KUL_JCR200_227_2_PRA_87 | FISCO019-10 | [BOLD:AAC4230](http://www.boldsystems.org/index.php/Public_BarcodeCluster?clusteruri=BOLD:AAC4230) | KUL | *Protomyctophum andriashevi* | 4/10/2009 | Antarctica | Southern Atlantic Ocean | -50,050 | -33,512 | 648 | 0 |
| FISCO | KUL_JCR200_227_2_PRA_88 | FISCO020-10 | [BOLD:AAC4230](http://www.boldsystems.org/index.php/Public_BarcodeCluster?clusteruri=BOLD:AAC4230) | KUL | *Protomyctophum andriashevi* | 4/10/2009 | Antarctica | Southern Atlantic Ocean | -50,050 | -33,512 | 648 | 0 |
| FISCO | KUL_JCR200_235_1_ELC_34 | FISCO004-10 |  | KUL | *Electrona carlsbergi* | 4/10/2009 | Antarctica | Southern Atlantic Ocean | -50,600 | -33,839 | 0 | 745 |
| FISCO | KUL_JCR200_235_1_ELC_35 | FISCO005-10 | [BOLD:AAB8433](http://www.boldsystems.org/index.php/Public_BarcodeCluster?clusteruri=BOLD:AAB8433) | KUL | *Electrona carlsbergi* | 4/10/2009 | Antarctica | Southern Atlantic Ocean | -50,600 | -33,839 | 648 | 745 |
| FISCO | KUL_JCR200_235_1_PRM_11 | FISCO016-10 | [BOLD:AAC7885](http://www.boldsystems.org/index.php/Public_BarcodeCluster?clusteruri=BOLD:AAC7885) | KUL | *Protomyctophum bolini* | 4/10/2009 | Antarctica | Southern Atlantic Ocean | -50,600 | -33,839 | 648 | 0 |
| FISCO | KUL_JCR200_235_1_PRM_12 | FISCO017-10 | [BOLD:AAC7885](http://www.boldsystems.org/index.php/Public_BarcodeCluster?clusteruri=BOLD:AAC7885) | KUL | *Protomyctophum bolini* | 4/10/2009 | Antarctica | Southern Atlantic Ocean | -50,600 | -33,839 | 648 | 0 |
| FISCO | KUL_JCR200_236_2_GYF_49 | FISCO040-10 |  | KUL |  | 4/11/2009 | Antarctica |  | -50,589 | -33,773 | 0 | 745 |
| FISCO | KUL_JCR200_55_1_GYN_32 | FISCO044-10 | [BOLD:AAB0899](http://www.boldsystems.org/index.php/Public_BarcodeCluster?clusteruri=BOLD:AAB0899) | KUL | *Gymnoscopelus nicholsi* | 3/20/2009 | Antarctica | South Orkney Islands | -59,688 | -44,067 | 648 | 745 |
| FISCO | KUL_JCR200_55_1_GYN_33 | FISCO045-10 | [BOLD:AAB0899](http://www.boldsystems.org/index.php/Public_BarcodeCluster?clusteruri=BOLD:AAB0899) | KUL | *Gymnoscopelus nicholsi* | 3/20/2009 | Antarctica | South Orkney Islands | -59,688 | -44,067 | 648 | 745 |
| FISCO | KUL_JCR200_55_2_PRY_133 | FISCO028-10 | [BOLD:AAD9636](http://www.boldsystems.org/index.php/Public_BarcodeCluster?clusteruri=BOLD:AAD9636) | KUL | *Protomyctophum choriodon* | 3/20/2009 | Antarctica | South Orkney Islands | -59,722 | -44,091 | 648 | 745 |
| FISCO | KUL_JCR200_55_2_PRY_134 | FISCO029-10 | [BOLD:AAD9636](http://www.boldsystems.org/index.php/Public_BarcodeCluster?clusteruri=BOLD:AAD9636) | KUL | *Protomyctophum choriodon* | 3/20/2009 | Antarctica | South Orkney Islands | -59,722 | -44,091 | 648 | 0 |
| FISCO | KUL_JCR200_56_1_GYO_1 | FISCO033-10 |  | KUL |  | 3/20/2009 | Antarctica |  | -59,698 | -44,084 | 0 | 0 |
| FISCO | KUL_JCR200_56_2_ELN_100 | FISCO050-10 | [BOLD:AAB3737](http://www.boldsystems.org/index.php/Public_BarcodeCluster?clusteruri=BOLD:AAB3737) | KUL | *Electrona antarctica* | 3/20/2009 | Antarctica | South Orkney Islands | -59,722 | -44,141 | 648 | 0 |
| FISCO | KUL_JCR200_56_2_ELN_101 | FISCO051-10 | [BOLD:AAB3737](http://www.boldsystems.org/index.php/Public_BarcodeCluster?clusteruri=BOLD:AAB3737) | KUL | *Electrona antarctica* | 3/20/2009 | Antarctica | South Orkney Islands | -59,722 | -44,141 | 648 | 0 |
| FISCO | KUL_JCR200_56_2_ELN_102 | FISCO052-10 | [BOLD:AAB3737](http://www.boldsystems.org/index.php/Public_BarcodeCluster?clusteruri=BOLD:AAB3737) | KUL | *Electrona antarctica* | 3/20/2009 | Antarctica | South Orkney Islands | -59,722 | -44,141 | 648 | 0 |
| FISCO | KUL_JCR200_56_2_ELN_98 | FISCO048-10 | [BOLD:AAB3737](http://www.boldsystems.org/index.php/Public_BarcodeCluster?clusteruri=BOLD:AAB3737) | KUL | *Electrona antarctica* | 3/20/2009 | Antarctica | South Orkney Islands | -59,722 | -44,141 | 640 | 0 |
| FISCO | KUL_JCR200_56_2_ELN_99 | FISCO049-10 | [BOLD:AAB3737](http://www.boldsystems.org/index.php/Public_BarcodeCluster?clusteruri=BOLD:AAB3737) | KUL | *Electrona antarctica* | 3/20/2009 | Antarctica | South Orkney Islands | -59,722 | -44,141 | 648 | 0 |
| FISCO | KUL_JCR200_56_2_GYN_3 | FISCO047-10 | [BOLD:AAB0899](http://www.boldsystems.org/index.php/Public_BarcodeCluster?clusteruri=BOLD:AAB0899) | KUL | *Gymnoscopelus nicholsi* | 3/20/2009 | Antarctica | South Orkney Islands | -59,722 | -44,141 | 648 | 0 |
| FISCO | KUL_JCR200_56_2_GYN_4 | FISCO046-10 | [BOLD:AAB0899](http://www.boldsystems.org/index.php/Public_BarcodeCluster?clusteruri=BOLD:AAB0899) | KUL | *Gymnoscopelus nicholsi* | 3/20/2009 | Antarctica | South Orkney Islands | -59,722 | -44,141 | 648 | 0 |
| FISCO | KUL_JCR200_82_2_ELC_4 | FISCO001-10 |  | KUL | *Electrona carlsbergi* | 3/23/2009 | Antarctica | Scotia Sea | -58,025 | -42,917 | 0 | 745 |
| FISCO | KUL_Lam_mac_27705 | FISCO110-10 | [BOLD:AAB3777](http://www.boldsystems.org/index.php/Public_BarcodeCluster?clusteruri=BOLD:AAB3777) | KUL | *Lampanyctus macdonaldi* |  | Antarctica |  |  |  | 630 | 0 |
| FISCO | KUL_Lam_mac_27719 | FISCO111-10 | [BOLD:AAB3777](http://www.boldsystems.org/index.php/Public_BarcodeCluster?clusteruri=BOLD:AAB3777) | KUL | *Lampanyctus macdonaldi* |  | Antarctica |  |  |  | 652 | 0 |
| FISCO | KUL_Lam_mac_27733 | FISCO112-10 | [BOLD:AAC1960](http://www.boldsystems.org/index.php/Public_BarcodeCluster?clusteruri=BOLD:AAC1960) | KUL | *Lobianchia dofleini* |  | Antarctica |  |  |  | 624 | 0 |
| FISCO | KUL_Lob_dof_27747 | FISCO113-10 | [BOLD:AAC1960](http://www.boldsystems.org/index.php/Public_BarcodeCluster?clusteruri=BOLD:AAC1960) | KUL | *Lobianchia dofleini* |  | Antarctica |  |  |  | 648 | 0 |
| FISCO | KUL_Lob_dof_27761 | FISCO114-10 | [BOLD:AAC1960](http://www.boldsystems.org/index.php/Public_BarcodeCluster?clusteruri=BOLD:AAC1960) | KUL | *Lobianchia gemellarii* |  | Antarctica |  |  |  | 626 | 0 |
| FISCO | KUL_Lob_dof_27775 | FISCO115-10 | [BOLD:AAC1960](http://www.boldsystems.org/index.php/Public_BarcodeCluster?clusteruri=BOLD:AAC1960) | KUL | *Lobianchia dofleini* |  | Antarctica |  |  |  | 609 | 0 |
| FISCO | KUL_Mac_sp._PS69FF_0198 | FISCO179-10 | [BOLD:AAA7123](http://www.boldsystems.org/index.php/Public_BarcodeCluster?clusteruri=BOLD:AAA7123) | KUL | *Macrourus sp.* | 7/3/2006 | Antarctica |  | -65,508 | 3,0498 | 644 | 0 |
| FISCO | KUL_Mur_sp._PS69FF_0185 | FISCO178-10 |  | KUL |  | 7/2/2006 | Antarctica |  | -65,018 | 0 | 0 | 0 |
| FISCO | KUL_Myc_pun_27873 | FISCO116-10 | [BOLD:AAB5848](http://www.boldsystems.org/index.php/Public_BarcodeCluster?clusteruri=BOLD:AAB5848) | KUL | *Myctophum punctatum* |  | Antarctica |  |  |  | 621 | 0 |
| FISCO | KUL_Myc_pun_27887 | FISCO117-10 |  | KUL | *Myctophum punctatum* |  | Antarctica |  |  |  | 0 | 0 |
| FISCO | KUL_Myc_pun_27901 | FISCO118-10 | [BOLD:AAB5848](http://www.boldsystems.org/index.php/Public_BarcodeCluster?clusteruri=BOLD:AAB5848) | KUL | *Myctophum punctatum* |  | Antarctica |  |  |  | 596 | 0 |
| FISCO | KUL_Not_coa_AAV3FF_00004 | FISCO143-10 |  | KUL |  | 1/21/2006 | Antarctica |  | -65,998 | 29,983 | 0 | 0 |
| FISCO | KUL_Not_coa_AAV3FF_00009 | FISCO144-10 |  | KUL |  | 1/23/2006 | Antarctica |  | -68,693 | 29,981 | 0 | 0 |
| FISCO | KUL_Not_coa_AAV3FF_00135 | FISCO147-10 |  | KUL |  | 1/27/2006 | Antarctica |  | -63,319 | 40,023 | 0 | 0 |
| FISCO | KUL_Not_coa_AAV3FF_00170 | FISCO148-10 | [BOLD:AAC0165](http://www.boldsystems.org/index.php/Public_BarcodeCluster?clusteruri=BOLD:AAC0165) | KUL | *Notolepis coatsi* | 1/29/2006 | Antarctica |  | -65,996 | 39,996 | 645 | 0 |
| FISCO | KUL_Not_coa_AAV3FF_00277 | FISCO154-10 | [BOLD:AAM8097](http://www.boldsystems.org/index.php/Public_BarcodeCluster?clusteruri=BOLD:AAM8097) | KUL | *Notolepis coatsi* | 2/9/2006 | Antarctica |  | -64,351 | 59,937 | 652 | 0 |
| FISCO | KUL_Not_coa_AAV3FF_00279 | FISCO155-10 |  | KUL |  | 2/10/2006 | Antarctica |  | -66,076 | 60,035 | 0 | 0 |
| FISCO | KUL_Not_coa_AAV3FF_00377 | FISCO173-10 | [BOLD:AAC0164](http://www.boldsystems.org/index.php/Public_BarcodeCluster?clusteruri=BOLD:AAC0164) | KUL | *Notolepis coatsi* | 2/25/2006 | Antarctica |  | -63,33 | 80,02 | 633 | 0 |
| FISCO | KUL_Not_coa_AAV3FF_00378 | FISCO174-10 | [BOLD:AAC0164](http://www.boldsystems.org/index.php/Public_BarcodeCluster?clusteruri=BOLD:AAC0164) | KUL | *Notolepis coatsi* | 2/25/2006 | Antarctica |  | -63,33 | 80,02 | 596 | 0 |
| FISCO | KUL_Not_kem_PS69FF_0540 | FISCO182-10 | [BOLD:AAA7826](http://www.boldsystems.org/index.php/Public_BarcodeCluster?clusteruri=BOLD:AAA7826) | KUL |  | 7/7/2006 | Antarctica |  | -68,96833333 | 2,9981 | 632 | 0 |
| FISCO | KUL_Not_kro_27789 | FISCO119-10 | [BOLD:AAB7073](http://www.boldsystems.org/index.php/Public_BarcodeCluster?clusteruri=BOLD:AAB7073) | KUL | *Notoscopelus elongatus* |  | Antarctica |  |  |  | 459 | 0 |
| FISCO | KUL_Not_kro_27803 | FISCO120-10 | [BOLD:AAB7073](http://www.boldsystems.org/index.php/Public_BarcodeCluster?clusteruri=BOLD:AAB7073) | KUL | *Notoscopelus elongatus* |  | Antarctica |  |  |  | 570 | 0 |
| FISCO | KUL_Not_kro_27817 | FISCO121-10 | [BOLD:AAC5632](http://www.boldsystems.org/index.php/Public_BarcodeCluster?clusteruri=BOLD:AAC5632) | KUL | *Notoscopelus elongatus* |  | Antarctica |  |  |  | 522 | 0 |
| FISCO | KUL_Ple_ant_AAV3FF_00077 | FISCO085-10 | [BOLD:AAB0924](http://www.boldsystems.org/index.php/Public_BarcodeCluster?clusteruri=BOLD:AAB0924) | KUL | *Pleuragramma antarctica* | 1/24/2006 | Antarctica |  | -68,462 | 35,009 | 651 | 0 |
| FISCO | KUL_Ple_ant_AAV3FF_00078 | FISCO086-10 | [BOLD:AAB0924](http://www.boldsystems.org/index.php/Public_BarcodeCluster?clusteruri=BOLD:AAB0924) | KUL | *Pleuragramma antarctica* | 1/24/2006 | Antarctica |  | -68,462 | 35,009 | 651 | 0 |
| FISCO | KUL_Ple_ant_AAV3FF_00079 | FISCO087-10 | [BOLD:AAB0924](http://www.boldsystems.org/index.php/Public_BarcodeCluster?clusteruri=BOLD:AAB0924) | KUL | *Pleuragramma antarctica* | 1/24/2006 | Antarctica |  | -68,462 | 35,009 | 651 | 0 |
| FISCO | KUL_Ple_ant_AAV3FF_00080 | FISCO145-10 | [BOLD:AAB0924](http://www.boldsystems.org/index.php/Public_BarcodeCluster?clusteruri=BOLD:AAB0924) | KUL | *Pleuragramma antarctica* | 1/24/2006 | Antarctica |  | -68,462 | 35,009 | 651 | 0 |
| FISCO | KUL_Ple_ant_AAV3FF_00081 | FISCO146-10 | [BOLD:AAB0924](http://www.boldsystems.org/index.php/Public_BarcodeCluster?clusteruri=BOLD:AAB0924) | KUL | *Pleuragramma antarctica* | 1/24/2006 | Antarctica |  | -68,462 | 35,009 | 644 | 0 |
| FISCO | KUL_Ple_ant_AAV3FF_00336 | FISCO082-10 | [BOLD:AAB0924](http://www.boldsystems.org/index.php/Public_BarcodeCluster?clusteruri=BOLD:AAB0924) | KUL | *Pleuragramma antarctica* | 2/20/2006 | Antarctica |  | -67,181 | 69,977 | 651 | 0 |
| FISCO | KUL_Ple_ant_AAV3FF_00337 | FISCO083-10 | [BOLD:AAB0924](http://www.boldsystems.org/index.php/Public_BarcodeCluster?clusteruri=BOLD:AAB0924) | KUL | *Pleuragramma antarctica* | 2/20/2006 | Antarctica |  | -67,181 | 69,977 | 651 | 0 |
| FISCO | KUL_Ple_ant_AAV3FF_00338 | FISCO084-10 | [BOLD:AAB0924](http://www.boldsystems.org/index.php/Public_BarcodeCluster?clusteruri=BOLD:AAB0924) | KUL | *Pleuragramma antarctica* | 2/20/2006 | Antarctica |  | -67,181 | 69,977 | 651 | 0 |
| FISCO | KUL_Ple_ant_AAV3FF_00344 | FISCO169-10 |  | KUL |  | 2/20/2006 | Antarctica |  | -67,296 | 69,948 | 0 | 0 |
| FISCO | KUL_Ple_ant_AAV3FF_00353 | FISCO171-10 | [BOLD:AAB0924](http://www.boldsystems.org/index.php/Public_BarcodeCluster?clusteruri=BOLD:AAB0924) | KUL | *Pleuragramma antarctica* | 2/21/2006 | Antarctica |  | -67,045 | 74,968 | 615 | 0 |
| FISCO | KUL_Ple_ant_PS69FF_0543 | FISCO183-10 | [BOLD:AAB0924](http://www.boldsystems.org/index.php/Public_BarcodeCluster?clusteruri=BOLD:AAB0924) | KUL | *Pleuragramma antarctica* | 7/7/2006 | Antarctica |  | -69,480 | 3,1518 | 651 | 0 |
| FISCO | KUL_Ple_ant_PS69FF_0544 | FISCO184-10 | [BOLD:AAB0924](http://www.boldsystems.org/index.php/Public_BarcodeCluster?clusteruri=BOLD:AAB0924) | KUL | *Pleuragramma antarctica* | 7/7/2006 | Antarctica |  | -69,480 | 3,1518 | 623 | 0 |
| FISCO | KUL_Ple_ant_PS69FF_0553 | FISCO181-10 | [BOLD:AAB0924](http://www.boldsystems.org/index.php/Public_BarcodeCluster?clusteruri=BOLD:AAB0924) | KUL | *Pleuragramma antarctica* | 7/8/2006 | Antarctica |  | -70,006 | 3,0666 | 644 | 0 |
| FISCO | KUL_Pog_mar_AAV3FF_00323 | FISCO159-10 | [BOLD:AAB5322](http://www.boldsystems.org/index.php/Public_BarcodeCluster?clusteruri=BOLD:AAB5322) | KUL | *Pogonophryne marmorata* | 2/19/2006 | Antarctica |  | -65,501 | 69,997 | 652 | 0 |
| FISCO | KUL_Pog_mar_AAV3FF_00350 | FISCO165-10 | [BOLD:AAB5322](http://www.boldsystems.org/index.php/Public_BarcodeCluster?clusteruri=BOLD:AAB5322) | KUL | *Pogonophryne marmorata* | 2/21/2006 | Antarctica |  | -67,045 | 74,968 | 641 | 0 |
| FISCO | KUL_Pri_eva_AAV3FF_00186 | FISCO150-10 |  | KUL |  | 1/30/2006 | Antarctica |  | -68,196 | 40,018 | 0 | 0 |
| FISCO | KUL_Pro_arc_20083 | FISCO124-10 | [BOLD:ACR2195](http://www.boldsystems.org/index.php/Public_BarcodeCluster?clusteruri=BOLD:ACR2195) | KUL | *Protomyctophum arcticum* |  | Antarctica |  |  |  | 629 | 0 |
| FISCO | KUL_Pro_arc_27929 | FISCO122-10 | [BOLD:ACR2195](http://www.boldsystems.org/index.php/Public_BarcodeCluster?clusteruri=BOLD:ACR2195) | KUL | *Protomyctophum arcticum* |  | Antarctica |  |  |  | 637 | 0 |
| FISCO | KUL_Pro_arc_27943 | FISCO126-10 | [BOLD:ACR2195](http://www.boldsystems.org/index.php/Public_BarcodeCluster?clusteruri=BOLD:ACR2195) | KUL | *Protomyctophum arcticum* |  | Antarctica |  |  |  | 652 | 0 |
| FISCO | KUL_Pro_arc_27957 | FISCO132-10 | [BOLD:ACR2195](http://www.boldsystems.org/index.php/Public_BarcodeCluster?clusteruri=BOLD:ACR2195) | KUL | *Protomyctophum arcticum* |  | Antarctica |  |  |  | 620 | 0 |
| FISCO | KUL_Pro_arc_27971 | FISCO134-10 | [BOLD:ACR2195](http://www.boldsystems.org/index.php/Public_BarcodeCluster?clusteruri=BOLD:ACR2195) | KUL | *Protomyctophum arcticum* |  | Antarctica |  |  |  | 652 | 0 |
| FISCO | KUL_Pro_arc_27999 | FISCO136-10 | [BOLD:ACR2195](http://www.boldsystems.org/index.php/Public_BarcodeCluster?clusteruri=BOLD:ACR2195) | KUL | *Protomyctophum arcticum* |  | Antarctica |  |  |  | 620 | 745 |
| FISCO | KUL_Pro_arc_28027 | FISCO130-10 |  | KUL | *Protomyctophum arcticum* |  | Antarctica |  |  |  | 0 | 0 |
| FISCO | KUL_Pro_arc_28041 | FISCO133-10 | [BOLD:ACR2195](http://www.boldsystems.org/index.php/Public_BarcodeCluster?clusteruri=BOLD:ACR2195) | KUL | *Protomyctophum arcticum* |  | Antarctica |  |  |  | 628 | 0 |
| FISCO | KUL_Pro_arc_28055 | FISCO123-10 | [BOLD:ACR2195](http://www.boldsystems.org/index.php/Public_BarcodeCluster?clusteruri=BOLD:ACR2195) | KUL | *Protomyctophum arcticum* |  | Antarctica |  |  |  | 648 | 0 |
| FISCO | KUL_Pro_arc_28097 | FISCO125-10 |  | KUL | *Protomyctophum arcticum* |  | Antarctica |  |  |  | 0 | 0 |
| FISCO | KUL_Pro_arc_28111 | FISCO131-10 | [BOLD:ACR2195](http://www.boldsystems.org/index.php/Public_BarcodeCluster?clusteruri=BOLD:ACR2195) | KUL | *Protomyctophum arcticum* |  | Antarctica |  |  |  | 630 | 0 |
| FISCO | KUL_Pro_arc_28125 | FISCO135-10 | [BOLD:ACR2195](http://www.boldsystems.org/index.php/Public_BarcodeCluster?clusteruri=BOLD:ACR2195) | KUL | *Protomyctophum arcticum* |  | Antarctica |  |  |  | 635 | 0 |
| FISCO | KUL_Pro_bol_PS69_FF_1788 | FISCO053-10 | [BOLD:AAC7885](http://www.boldsystems.org/index.php/Public_BarcodeCluster?clusteruri=BOLD:AAC7885) | KUL | *Protomyctophum bolini* | 8/14/2006 | Antarctica | Lazarev Sea | -56,014 | 3,3687 | 648 | 0 |
| FISCO | KUL_Pro_bol_PS69_FF_1791 | FISCO054-10 | [BOLD:AAC7885](http://www.boldsystems.org/index.php/Public_BarcodeCluster?clusteruri=BOLD:AAC7885) | KUL | *Protomyctophum bolini* | 8/14/2006 | Antarctica | Lazarev Sea | -56,014 | 3,3687 | 648 | 0 |
| FISCO | KUL_Pro_bol_PS69_FF_1792 | FISCO055-10 | [BOLD:AAC7885](http://www.boldsystems.org/index.php/Public_BarcodeCluster?clusteruri=BOLD:AAC7885) | KUL | *Protomyctophum bolini* | 8/14/2006 | Antarctica | Lazarev Sea | -56,014 | 3,3687 | 648 | 745 |
| FISCO | KUL_Pro_bol_PS69_FF_1794 | FISCO056-10 | [BOLD:AAC7885](http://www.boldsystems.org/index.php/Public_BarcodeCluster?clusteruri=BOLD:AAC7885) | KUL | *Protomyctophum bolini* | 8/14/2006 | Antarctica | Lazarev Sea | -56,014 | 3,3687 | 648 | 0 |
| FISCO | KUL_Pro_bol_PS69_FF_1795 | FISCO057-10 | [BOLD:AAC7885](http://www.boldsystems.org/index.php/Public_BarcodeCluster?clusteruri=BOLD:AAC7885) | KUL | *Protomyctophum bolini* | 8/14/2006 | Antarctica | Lazarev Sea | -56,014 | 3,3687 | 648 | 0 |
| FISCO | KUL_Sym_ver_27831 | FISCO127-10 | [BOLD:AAU6312](http://www.boldsystems.org/index.php/Public_BarcodeCluster?clusteruri=BOLD:AAU6312) | KUL | *Symbolophorus veranyi* |  | Antarctica |  |  |  | 589 | 0 |
| FISCO | KUL_Sym_ver_27845 | FISCO128-10 | [BOLD:AAC4870](http://www.boldsystems.org/index.php/Public_BarcodeCluster?clusteruri=BOLD:AAC4870) | KUL | *Symbolophorus veranyi* |  | Antarctica |  |  |  | 629 | 0 |
| FISCO | KUL_Sym_ver_27859 | FISCO129-10 |  | KUL | *Symbolophorus veranyi* |  | Antarctica |  |  |  | 0 | 0 |
| FISCO | KUL_Tre_sp._AAV3FF_00339 | FISCO162-10 |  | KUL |  | 2/20/2006 | Antarctica |  | -67,181 | 69,977 | 0 | 0 |
| FISCO | KUL_Tre_sp._PS69A_0048 | FISCO177-10 | [BOLD:AAA6710](http://www.boldsystems.org/index.php/Public_BarcodeCluster?clusteruri=BOLD:AAA6710) | KUL | *Trematomus sp.* | 6/28/2006 | Antarctica |  | -61,953 | 3,096 | 650 | 0 |
| FISCO | KUL_Unid_sp._PS65FF_644_10 | FISCO190-10 |  | KUL |  | 04/14/04 | Antarctica |  | -64,34 | -4,007 | 0 | 0 |
| MYCSO | AM2013-St51E1 | MYCSO026-13 | [BOLD:ACN1843](http://www.boldsystems.org/index.php/Public_BarcodeCluster?clusteruri=BOLD:ACN1843) | MNHN | *Ceratoscopelus warmingii* | 14-Feb-2013 | Pacific Ocean |  | -16,012 | -176,10 | 651 | 0 |
| MYCSO | AM2013-St51E2 | MYCSO027-13 | [BOLD:ABV1888](http://www.boldsystems.org/index.php/Public_BarcodeCluster?clusteruri=BOLD:ABV1888) | MNHN | *Symbolophorus* sp. | 14-Feb-2013 | Pacific Ocean |  | -16,012 | -176,10 | 651 | 814 |
| MYCSO | AM2013-St51F | MYCSO028-13 | [BOLD:AAE0838](http://www.boldsystems.org/index.php/Public_BarcodeCluster?clusteruri=BOLD:AAE0838) | MNHN | *Diaphus brachycephalus* | 14-Feb-2013 | Pacific Ocean |  | -16,012 | -176,10 | 651 | 813 |
| MYCSO | AM2013-St51G | MYCSO029-13 | [BOLD:AAV7884](http://www.boldsystems.org/index.php/Public_BarcodeCluster?clusteruri=BOLD:AAV7884) | MNHN | *Lampadena luminosa* | 14-Feb-2013 | Pacific Ocean |  | -16,012 | -176,10 | 651 | 814 |
| MYCSO | AM2013-St52D | MYCSO052-13 | [BOLD:AAC6978](http://www.boldsystems.org/index.php/Public_BarcodeCluster?clusteruri=BOLD:AAC6978) | MNHN | *Diaphus* | 15-Feb-2013 | Pacific Ocean |  | -19,998 | -176,07 | 651 | 814 |
| MYCSO | AM2013-St52H | MYCSO056-13 | [BOLD:ACI7335](http://www.boldsystems.org/index.php/Public_BarcodeCluster?clusteruri=BOLD:ACI7335) | MNHN | *Diaphus* | 15-Feb-2013 | Pacific Ocean |  | -19,998 | -176,07 | 651 | 814 |
| MYCSO | AM2013-St52J | MYCSO058-13 |  | MNHN | *Lampanyctus* | 15-Feb-2013 | Pacific Ocean |  | -19,998 | -176,07 | 0 | 814 |
| MYCSO | AM2013-St52L | MYCSO060-13 | [BOLD:AAG0288](http://www.boldsystems.org/index.php/Public_BarcodeCluster?clusteruri=BOLD:AAG0288) | MNHN | *Lampanyctus* | 15-Feb-2013 | Pacific Ocean |  | -19,998 | -176,07 | 651 | 814 |
| MYCSO | AM2013-St52M | MYCSO016-13 |  | MNHN | *Diaphus* | 15-Feb-2013 | Pacific Ocean |  | -19,998 | -176,07 | 0 | 814 |
| MYCSO | AM2013-St52N | MYCSO017-13 | [BOLD:AAI3244](http://www.boldsystems.org/index.php/Public_BarcodeCluster?clusteruri=BOLD:AAI3244) | MNHN | *Myctophum* | 15-Feb-2013 | Pacific Ocean |  | -19,998 | -176,07 | 651 | 814 |
| MYCSO | AM2013-St52P | MYCSO019-13 | [BOLD:ACI7353](http://www.boldsystems.org/index.php/Public_BarcodeCluster?clusteruri=BOLD:ACI7353) | MNHN | *Diogenichthys* | 15-Feb-2013 | Pacific Ocean |  | -19,998 | -176,07 | 651 | 787 |
| MYCSO | AM2013-St53B | MYCSO067-13 |  | MNHN | *Symbolophorus* | 15-Feb-2013 | Pacific Ocean |  | -19,992 | -178,00 | 0 | 814 |
| MYCSO | AM2013-St53D | MYCSO069-13 | [BOLD:AAC6978](http://www.boldsystems.org/index.php/Public_BarcodeCluster?clusteruri=BOLD:AAC6978) | MNHN | *Diaphus* | 15-Feb-2013 | Pacific Ocean |  | -19,992 | -178,00 | 651 | 790 |
| MYCSO | AM2013-St56A | MYCSO063-13 | [BOLD:ACI7772](http://www.boldsystems.org/index.php/Public_BarcodeCluster?clusteruri=BOLD:ACI7772) | MNHN | *Centrobranchus* | 18-Feb-2013 | Pacific Ocean |  | -22,003 | -167,99 | 651 | 0 |
| MYCSO | AM2013-St56B | MYCSO064-13 | [BOLD:AAD4625](http://www.boldsystems.org/index.php/Public_BarcodeCluster?clusteruri=BOLD:AAD4625) | MNHN | *Symbolophorus evermanni* | 18-Feb-2013 | Pacific Ocean |  | -22,003 | -167,99 | 651 | 814 |
| MYCSO | AM2013-St56F | MYCSO033-13 | [BOLD:AAF2697](http://www.boldsystems.org/index.php/Public_BarcodeCluster?clusteruri=BOLD:AAF2697) | MNHN | *Notolychnus valdiviae* | 18-Feb-2013 | Pacific Ocean |  | -22,003 | -167,99 | 651 | 0 |
| MYCSO | AM2013-St56G | MYCSO034-13 |  | MNHN | *Lampanyctus alatus* | 18-Feb-2013 | Pacific Ocean |  | -22,003 | -167,99 | 0 | 814[5n] |
| MYCSO | AM2013-St56H | MYCSO035-13 |  | MNHN | *Myctophidae* | 18-Feb-2013 | Pacific Ocean |  | -22,003 | -167,99 | 0 | 814 |
| MYCSO | AM2013-St56L | MYCSO039-13 | [BOLD:AAF2697](http://www.boldsystems.org/index.php/Public_BarcodeCluster?clusteruri=BOLD:AAF2697) | MNHN | *Notolychnus valdiviae* | 18-Feb-2013 | Pacific Ocean |  | -22,003 | -167,99 | 651 | 0 |
| MYCSO | AM2013-St56R | MYCSO046-13 | [BOLD:ACI7621](http://www.boldsystems.org/index.php/Public_BarcodeCluster?clusteruri=BOLD:ACI7621) | MNHN | *Myctophidae* | 18-Feb-2013 | Pacific Ocean |  | -22,003 | -167,99 | 651 | 814 |
| MYCSO | AM2013-St58A1 | MYCSO048-13 | [BOLD:AAI3244](http://www.boldsystems.org/index.php/Public_BarcodeCluster?clusteruri=BOLD:AAI3244) | MNHN | *Myctophum* sp. | 18-Feb-2013 | Pacific Ocean |  | -18,149 | -169,95 | 651 | 814 |
| MYCSO | AM2013-St58B | MYCSO062-13 | [BOLD:ABW8492](http://www.boldsystems.org/index.php/Public_BarcodeCluster?clusteruri=BOLD:ABW8492) | MNHN | *Myctophidae* | 18-Feb-2013 | Pacific Ocean |  | -18,149 | -169,95 | 651 | 814 |
| MYCSO | AM2013-St58C | MYCSO079-13 | [BOLD:AAV7884](http://www.boldsystems.org/index.php/Public_BarcodeCluster?clusteruri=BOLD:AAV7884) | MNHN | *Lampadena luminosa* | 18-Feb-2013 | Pacific Ocean |  | -18,149 | -169,95 | 651 | 814 |
| MYCSO | AM2013-St58I | MYCSO086-13 | [BOLD:AAF2697](http://www.boldsystems.org/index.php/Public_BarcodeCluster?clusteruri=BOLD:AAF2697) | MNHN | *Notolychnus valdiviae* | 18-Feb-2013 | Pacific Ocean |  | -18,149 | -169,95 | 651 | 814 |
| MYCSO | AM2013-St58J | MYCSO001-13 | [BOLD:AAF2697](http://www.boldsystems.org/index.php/Public_BarcodeCluster?clusteruri=BOLD:AAF2697) | MNHN | *Notolychnus valdiviae* | 18-Feb-2013 | Pacific Ocean |  | -18,149 | -169,95 | 651 | 0 |
| MYCSO | AM2013-St58N | MYCSO083-13 | [BOLD:ACN1843](http://www.boldsystems.org/index.php/Public_BarcodeCluster?clusteruri=BOLD:ACN1843) | MNHN | *Ceratoscopelus warmingii* | 18-Feb-2013 | Pacific Ocean |  | -18,149 | -169,95 | 651 | 0 |
| MYCSO | AM2013-St60A1 | MYCSO077-13 | [BOLD:AAK8894](http://www.boldsystems.org/index.php/Public_BarcodeCluster?clusteruri=BOLD:AAK8894) | MNHN | *Myctophum spinosum* | 19-Feb-2013 | Pacific Ocean |  | -14,002 | -169,99 | 651 | 814 |
| MYCSO | AM2013-St60A2 | MYCSO078-13 | [BOLD:AAX3219](http://www.boldsystems.org/index.php/Public_BarcodeCluster?clusteruri=BOLD:AAX3219) | MNHN | *Myctophum* | 19-Feb-2013 | Pacific Ocean |  | -14,002 | -169,99 | 651 | 814 |
| MYCSO | AM2013-St60E | MYCSO008-13 | [BOLD:ACI7790](http://www.boldsystems.org/index.php/Public_BarcodeCluster?clusteruri=BOLD:ACI7790) | MNHN | *Hygophum* | 19-Feb-2013 | Pacific Ocean |  | -14,002 | -169,99 | 651 | 814 |
| MYCSO | AM2013-St60F | MYCSO009-13 | [BOLD:ACI7389](http://www.boldsystems.org/index.php/Public_BarcodeCluster?clusteruri=BOLD:ACI7389) | MNHN | *Myctophidae* | 19-Feb-2013 | Pacific Ocean |  | -14,002 | -169,99 | 651 | 814 |
| MYCSO | AM2013-St60G | MYCSO010-13 | [BOLD:AAC9267](http://www.boldsystems.org/index.php/Public_BarcodeCluster?clusteruri=BOLD:AAC9267) | MNHN | *Diaphus* | 19-Feb-2013 | Pacific Ocean |  | -14,002 | -169,99 | 651 | 814 |
| MYCSO | AM2013-St64A | MYCSO070-13 | [BOLD:AAK8894](http://www.boldsystems.org/index.php/Public_BarcodeCluster?clusteruri=BOLD:AAK8894) | MNHN | *Myctophum spinosum* | 21-Feb-2013 | Pacific Ocean |  | -8 | -167,99 | 651 | 814 |
| MYCSO | AM2013-St64C | MYCSO072-13 | [BOLD:AAE0839](http://www.boldsystems.org/index.php/Public_BarcodeCluster?clusteruri=BOLD:AAE0839) | MNHN | *Diaphus richardsoni* | 21-Feb-2013 | Pacific Ocean |  | -8 | -167,99 | 613 | 814 |
| MYCSO | AM2013-St64F | MYCSO075-13 |  | MNHN | *Symbolophorus* | 21-Feb-2013 | Pacific Ocean |  | -8 | -167,99 | 0 | 814 |
| MYCSO | AM2013-St65A | MYCSO061-13 | [BOLD:ACI7772](http://www.boldsystems.org/index.php/Public_BarcodeCluster?clusteruri=BOLD:ACI7772) | MNHN | *Centrobranchus* sp. | 23-Feb-2013 | Pacific Ocean |  | -12,014 | -174,04 | 651 | 0 |
| MYCSO | POKER9203 | FKCIR025-11 |  | MNHN | *Lampadena sp.* | 28-Aug-2010 | France |  | -46,387 | 67,943 | 0 | 0 |
| MYCSO | POKER9292 | FKCIR112-11 | [BOLD:AAC0459](http://www.boldsystems.org/index.php/Public_BarcodeCluster?clusteruri=BOLD:AAC0459) | MNHN | *Gymnoscopelus hintonoides* | 06-Sep-2010 | France |  | -46,984 | 70,683 | 652 | 786 |
| MYCSO | POKER9293 | FKCIR113-11 | [BOLD:AAC0459](http://www.boldsystems.org/index.php/Public_BarcodeCluster?clusteruri=BOLD:AAC0459) | MNHN | *Gymnoscopelus hintonoides* | 06-Sep-2010 | France |  | -46,984 | 70,683 | 652 | 791 |
| MYCSO | POKER9294 | FKCIR114-11 | [BOLD:AAC0459](http://www.boldsystems.org/index.php/Public_BarcodeCluster?clusteruri=BOLD:AAC0459) | MNHN | *Gymnoscopelus hintonoides* | 06-Sep-2010 | France |  | -46,984 | 70,683 | 652 | 786 |
| MYCSO | POKER9295 | FKCIR115-11 |  | MNHN | *Gymnoscopelus hintonoides* | 06-Sep-2010 | France |  | -46,984 | 70,683 | 0 | 815 |
| MYCSO | POKER9300 | FKCIR120-11 |  | MNHN | *Gymnoscopelus bolini* | 06-Sep-2010 | France |  | -46,984 | 70,683 | 0 | 786 |
| MYCSO | POKER9301 | FKCIR121-11 |  | MNHN | *Gymnoscopelus braueri* | 06-Sep-2010 | France |  | -46,984 | 70,683 | 0 | 0 |
| MYCSO | POKER9302 | FKCIR122-11 | [BOLD:AAB5232](http://www.boldsystems.org/index.php/Public_BarcodeCluster?clusteruri=BOLD:AAB5232) | MNHN | *Gymnoscopelus braueri* | 06-Sep-2010 | France |  | -46,984 | 70,683 | 652 | 786 |
| MYCSO | POKER9303 | FKCIR123-11 | [BOLD:AAB5232](http://www.boldsystems.org/index.php/Public_BarcodeCluster?clusteruri=BOLD:AAB5232) | MNHN | *Gymnoscopelus braueri* | 06-Sep-2010 | France |  | -46,984 | 70,683 | 652 | 786 |
| MYCSO | POKER9304 | FKCIR124-11 |  | MNHN | *Gymnoscopelus braueri* | 06-Sep-2010 | France |  | -46,984 | 70,683 | 0 | 786 |
| MYCSO | POKER9335 | FKCIR155-11 | [BOLD:AAC6875](http://www.boldsystems.org/index.php/Public_BarcodeCluster?clusteruri=BOLD:AAC6875) | MNHN | *Krefftichthys anderssoni* | 10-Sep-2010 | France |  | -50,939 | 71,993 | 652 | 801 |
| MYCSO | POKER9337 | FKCIR157-11 | [BOLD:AAB3778](http://www.boldsystems.org/index.php/Public_BarcodeCluster?clusteruri=BOLD:AAB3778) | MNHN | *Nannobrachium achirus* | 10-Sep-2010 | France |  | -50,939 | 71,993 | 652 | 786 |
| MYCSO | POKER9340 | FKCIR160-11 | [BOLD:ACE4884](http://www.boldsystems.org/index.php/Public_BarcodeCluster?clusteruri=BOLD:ACE4884) | MNHN | *Gymnoscopelus fraseri* | 11-Sep-2010 | France |  | -48,769 | 71,071 | 652 | 801 |
| MYCSO | POKER9347 | FKCIR167-11 |  | MNHN | *Gymnoscopelus braueri* | 13-Sep-2010 | France |  | -50,477 | 71,885 | 0 | 801 |
| MYCSO | POKER9348 | FKCIR168-11 |  | MNHN | *Gymnoscopelus microlampas* | 13-Sep-2010 | France |  | -50,791 | 70,945 | 0 | 0 |
| MYCSO | POKER9349 | FKCIR169-11 | [BOLD:AAB5232](http://www.boldsystems.org/index.php/Public_BarcodeCluster?clusteruri=BOLD:AAB5232) | MNHN | *Gymnoscopelus braueri* | 13-Sep-2010 | France |  | -50,791 | 70,945 | 602 | 801 |
| MYCSO | POKER9350 | FKCIR170-11 | [BOLD:AAB5232](http://www.boldsystems.org/index.php/Public_BarcodeCluster?clusteruri=BOLD:AAB5232) | MNHN | *Gymnoscopelus braueri* | 13-Sep-2010 | France |  | -50,791 | 70,945 | 652 | 786 |
| MYCSO | POKER9367 | FKCIR187-11 | [BOLD:AAC8208](http://www.boldsystems.org/index.php/Public_BarcodeCluster?clusteruri=BOLD:AAC8208) | MNHN | *Idiacanthus atlanticus* | 14-Sep-2010 | France |  | -50,699 | 70,343 | 652 | 801 |
| MYCSO | POKER9434 | FKCIR254-11 | [BOLD:AAC8208](http://www.boldsystems.org/index.php/Public_BarcodeCluster?clusteruri=BOLD:AAC8208) | MNHN | *Idiacanthus atlanticus* | 25-Sep-2010 | France |  | -49,708 | 67,489 | 652 | 786 |
| MYCSO | POKER9441 | FKCIR261-11 |  | MNHN | *Electrona antarctica* | 07-Sep-2010 | France |  | -47,741 | 72,069 | 0 | 0 |
| MYCSO | POKER9442 | FKCIR262-11 |  | MNHN | *Electrona carlsbergi* | 28-Aug-2010 | France |  | -46,398 | 67,617 | 0 | 0 |
| MYCSO | POKER9443 | FKCIR263-11 |  | MNHN | *Electrona carlsbergi* | 14-Sep-2010 | France |  | -50,925 | 70,153 | 0 | 0 |
| MYCSO | POKER9444 | FKCIR264-11 |  | MNHN | *Electrona antarctica* | 14-Sep-2010 | France |  | -50,925 | 70,153 | 0 | 0 |
| MYCSO | POKER9445 | FKCIR265-11 | [BOLD:AAC6875](http://www.boldsystems.org/index.php/Public_BarcodeCluster?clusteruri=BOLD:AAC6875) | MNHN | *Krefftichthys anderssoni* | 21-Sep-2010 | France |  | -47,38 | 66,791 | 652 | 0 |
| MYCSO | POKER9446 | FKCIR266-11 |  | MNHN | *Gymnoscopelus braueri* | 28-Aug-2010 | France |  | -46,417 | 67,177 | 0 | 815 |
| MYCSO | POKER9447 | FKCIR267-11 |  | MNHN | *Gymnoscopelus braueri* | 07-Sep-2010 | France |  | -47,677 | 72,087 | 0 | 0 |
| MYCSO | POKER9448 | FKCIR268-11 |  | MNHN | *Gymnoscopelus braueri* | 07-Sep-2010 | France |  | -47,677 | 72,087 | 0 | 815 |
| MYCSO | POKER9450 | FKCIR269-11 | [BOLD:AAB3737](http://www.boldsystems.org/index.php/Public_BarcodeCluster?clusteruri=BOLD:AAB3737) | MNHN | *Electrona antarctica* | 13-Sep-2010 | France |  | -50,791 | 70,945 | 652 | 0 |
| MYCSO | POKER9451 | FKCIR270-11 | [BOLD:AAB3737](http://www.boldsystems.org/index.php/Public_BarcodeCluster?clusteruri=BOLD:AAB3737) | MNHN | *Electrona antarctica* | 13-Sep-2010 | France |  | -50,791 | 70,945 | 652 | 0 |
| MYCSO | POKER9452 | FKCIR271-11 | [BOLD:AAB3737](http://www.boldsystems.org/index.php/Public_BarcodeCluster?clusteruri=BOLD:AAB3737) | MNHN | *Electrona antarctica* | 13-Sep-2010 | France |  | -50,791 | 70,945 | 603 | 0 |
| MYCSO | POKER9453 | FKCIR272-11 | [BOLD:AAC6875](http://www.boldsystems.org/index.php/Public_BarcodeCluster?clusteruri=BOLD:AAC6875) | MNHN | *Krefftichthys anderssoni* | 10-Sep-2010 | France |  | -48,214 | 72,66 | 652 | 0 |
| MYCSO | POKER9454 | FKCIR273-11 |  | MNHN | *Electrona carlsbergi* | 27-Sep-2010 | France |  | -45,015 | 69,338 | 0 | 801 |
| MYCSO | POKER9455 | FKCIR274-11 |  | MNHN | *Gymnoscopelus nicholsi* | 06-Sep-2010 | France |  | -47,241 | 72,038 | 0 | 0 |
| MYCSO | POKER9456 | FKCIR275-11 |  | MNHN | *Gymnoscopelus braueri* | 28-Aug-2010 | France |  | -46,417 | 67,177 | 0 | 0 |
| MYCSO | POKER9457 | FKCIR276-11 | [BOLD:AAB5232](http://www.boldsystems.org/index.php/Public_BarcodeCluster?clusteruri=BOLD:AAB5232) | MNHN | *Gymnoscopelus braueri* | 28-Aug-2010 | France |  | -46,511 | 67,772 | 603 | 815 |
| MYCSO | POKER9458 | FKCIR277-11 |  | MNHN | *Gymnoscopelus braueri* | 28-Aug-2010 | France |  | -46,511 | 67,772 | 0 | 801 |
| MYCSO | POKER9459 | FKCIR278-11 |  | MNHN | *Gymnoscopelus braueri* | 28-Aug-2010 | France |  | -46,387 | 67,943 | 0 | 815 |
| MYCSO | POKER9460 | FKCIR279-11 |  | MNHN | *Gymnoscopelus braueri* | 28-Aug-2010 | France |  | -46,387 | 67,943 | 0 | 0 |
| MYCSO | POKER9461 | FKCIR280-11 |  | MNHN | *Nannobrachium achirus* | 16-Sep-2010 | France |  | -48,092 | 71,263 | 0 | 0 |
| MYCSO | POKER9462 | FKCIR281-11 |  | MNHN | *Electrona carlsbergi* | 03-Sep-2010 | France |  | -46,569 | 69,19 | 0 | 0 |
| MYCSO | POKER9463 | FKCIR282-11 |  | MNHN | *Electrona carlsbergi* | 03-Sep-2010 | France |  | -46,569 | 69,19 | 0 | 0 |
| MYCSO | POKER9464 | FKCIR283-11 |  | MNHN | *Electrona carlsbergi* | 03-Sep-2010 | France |  | -46,569 | 69,19 | 0 | 0 |
| MYCSO | POKER9465 | FKCIR284-11 | [BOLD:AAB0899](http://www.boldsystems.org/index.php/Public_BarcodeCluster?clusteruri=BOLD:AAB0899) | MNHN | *Gymnoscopelus nicholsi* | 06-Sep-2010 | France |  | -46,99 | 70,458 | 652 | 0 |
| MYCSO | POKER9466 | FKCIR285-11 | [BOLD:AAB0899](http://www.boldsystems.org/index.php/Public_BarcodeCluster?clusteruri=BOLD:AAB0899) | MNHN | *Gymnoscopelus nicholsi* | 06-Sep-2010 | France |  | -46,99 | 70,458 | 652 | 0 |
| MYCSO | POKER9467 | FKCIR286-11 | [BOLD:AAB0899](http://www.boldsystems.org/index.php/Public_BarcodeCluster?clusteruri=BOLD:AAB0899) | MNHN | *Gymnoscopelus nicholsi* | 06-Sep-2010 | France |  | -46,99 | 70,458 | 652 | 0 |
| MYCSO | POKER9468 | FKCIR287-11 |  | MNHN | *Gymnoscopelus nicholsi* | 28-Aug-2010 | France |  | -46,511 | 67,772 | 0 | 815 |
| MYCSO | POKER9469 | FKCIR288-11 | [BOLD:AAB0899](http://www.boldsystems.org/index.php/Public_BarcodeCluster?clusteruri=BOLD:AAB0899) | MNHN | *Gymnoscopelus nicholsi* | 01-Sep-2010 | France |  | -47,507 | 67,248 | 652 | 0 |
| MYCSO | POKER9470 | FKCIR289-11 |  | MNHN | *Gymnoscopelus nicholsi* | 07-Sep-2010 | France |  | -47,624 | 71,844 | 0 | 815 |
| MYCSO | POKER9471 | FKCIR290-11 | [BOLD:AAB0899](http://www.boldsystems.org/index.php/Public_BarcodeCluster?clusteruri=BOLD:AAB0899) | MNHN | *Gymnoscopelus nicholsi* | 07-Sep-2010 | France |  | -47,624 | 71,844 | 652 | 0 |
| MYCSO | POKER9472 | FKCIR291-11 |  | MNHN | *Gymnoscopelus nicholsi* | 31-Aug-2010 | France |  | -46,736 | 67,422 | 0 | 0 |
| MYCSO | POKER9473 | FKCIR292-11 |  | MNHN | *Gymnoscopelus nicholsi* | 31-Aug-2010 | France |  | -46,736 | 67,422 | 0 | 0 |
| MYCSO | POKER9474 | FKCIR293-11 |  | MNHN | *Gymnoscopelus nicholsi* | 06-Sep-2010 | France |  | -45,052 | 70,424 | 0 | 0 |
| MYCSO | POKER9475 | FKCIR294-11 | [BOLD:AAB3737](http://www.boldsystems.org/index.php/Public_BarcodeCluster?clusteruri=BOLD:AAB3737) | MNHN | *Electrona antarctica* | 09-Sep-2010 | France |  | -48,527 | 72,013 | 603 | 0 |
| MYCSO | POKER9476 | FKCIR295-11 | [BOLD:AAB3737](http://www.boldsystems.org/index.php/Public_BarcodeCluster?clusteruri=BOLD:AAB3737) | MNHN | *Electrona antarctica* | 09-Sep-2010 | France |  | -48,527 | 72,013 | 603 | 0 |
| MYCSO | POKER9477 | FKCIR296-11 | [BOLD:AAB3737](http://www.boldsystems.org/index.php/Public_BarcodeCluster?clusteruri=BOLD:AAB3737) | MNHN | *Electrona antarctica* | 09-Sep-2010 | France |  | -48,527 | 72,013 | 652 | 0 |
| MYCSO | POKER9478 | FKCIR297-11 | [BOLD:AAB3737](http://www.boldsystems.org/index.php/Public_BarcodeCluster?clusteruri=BOLD:AAB3737) | MNHN | *Electrona antarctica* | 07-Sep-2010 | France |  | -46,121 | 71,627 | 603 | 0 |
| MYCSO | POKER9479 | FKCIR298-11 |  | MNHN | *Electrona antarctica* | 28-Aug-2010 | France |  | -46,511 | 67,772 | 0 | 0 |
| MYCSO | POKER9480 | FKCIR299-11 | [BOLD:AAB3737](http://www.boldsystems.org/index.php/Public_BarcodeCluster?clusteruri=BOLD:AAB3737) | MNHN | *Electrona antarctica* | 13-Sep-2010 | France |  | -50,477 | 71,885 | 652 | 0 |
| MYCSO | POKER9481 | FKCIR300-11 | [BOLD:AAB3737](http://www.boldsystems.org/index.php/Public_BarcodeCluster?clusteruri=BOLD:AAB3737) | MNHN | *Electrona antarctica* | 13-Sep-2010 | France |  | -50,477 | 71,885 | 652 | 0 |
| MYCSO | POKER9482 | FKCIR301-11 | [BOLD:AAB3737](http://www.boldsystems.org/index.php/Public_BarcodeCluster?clusteruri=BOLD:AAB3737) | MNHN | *Electrona antarctica* | 13-Sep-2010 | France |  | -50,477 | 71,885 | 652 | 0 |
| MYCSO | POKER9483 | FKCIR302-11 | [BOLD:AAB3737](http://www.boldsystems.org/index.php/Public_BarcodeCluster?clusteruri=BOLD:AAB3737) | MNHN | *Electrona antarctica* | 13-Sep-2010 | France |  | -50,477 | 71,885 | 652 | 0 |
| MYCSO | POKER9485 | FKCIR304-11 | [BOLD:AAC0459](http://www.boldsystems.org/index.php/Public_BarcodeCluster?clusteruri=BOLD:AAC0459) | MNHN | *Gymnoscopelus hintonoides* | 06-Sep-2010 | France |  | -47,241 | 72,038 | 603 | 0 |
| MYCSO | POKER9486 | FKCIR305-11 |  | MNHN | *Gymnoscopelus bolini* | 28-Aug-2010 | France |  | -46,511 | 67,772 | 0 | 0 |
| MYCSO | POKER9487 | FKCIR306-11 | [BOLD:AAC5123](http://www.boldsystems.org/index.php/Public_BarcodeCluster?clusteruri=BOLD:AAC5123) | MNHN | *Gymnoscopelus bolini* | 06-Sep-2010 | France |  | -47,241 | 72,038 | 603 | 0 |
|  |  |  |  |  |  |  |  |  |  |  |  |  |
